# Supplementary material for: DFT studies on catalytic properties of isolated and carbon nanotube supported Pd9cluster : Part II. Hydro-isomerization of butene isomers
Source: Royal Society of Chemistry journal article supplement (doi:10.1039/b920949m), 2009-12-11
Supplement: b920949m.pdf [file b920949m.pdf]

**Supporting Information** for the manuscript “*DFT studies on catalytic properties of isolated and carbon nanotube supported Pd<sub>9</sub> cluster – II: hydro-isomerization of butene isomers*” by the authors Vincenza D’Anna, Dario Duca, Francesco Ferrante and Gianfranco La Manna.

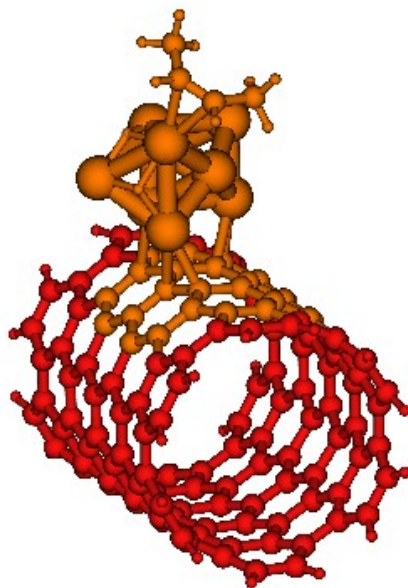

**Figure S1.** The definition of the ONIOM layers employed in the study of the supported systems: the model system, consisting of the Pd<sub>9</sub> cluster, the molecules adsorbed/fragmented on it and a coronene-like portion of the carbon nanotube surface, is in orange (the *cis*-but-2-ene/Pd<sub>9</sub>(H<sub>2</sub>)/nanotube system is reported as an example).

**Optimized geometries** of the most stable minima and transition states in xyz format; the normal modes of vibration with the imaginary frequency are reported for TSs by using the Gaussian03 format.

***cis-but-2-ene/Pd<sub>9</sub>(H<sub>2</sub>)***

|    |           |           |           |    |           |           |           |
|----|-----------|-----------|-----------|----|-----------|-----------|-----------|
| 23 |           |           |           | Pd | 2.759140  | -0.143914 | 1.335370  |
|    |           |           |           | Pd | 2.710742  | -0.152781 | -1.306388 |
| H  | -4.668555 | 1.957043  | -0.831062 | H  | -2.453478 | -1.383269 | 0.225773  |
| C  | -3.753443 | 2.433600  | -0.470479 | H  | -1.665908 | -0.088129 | -1.501618 |
| C  | -3.541830 | 2.440060  | 0.906413  | C  | -3.027261 | 3.290856  | -1.490701 |
| H  | -4.306621 | 1.967136  | 1.528905  | C  | -2.545154 | 3.305189  | 1.656284  |
| Pd | -2.655273 | 0.456823  | 0.084757  | H  | -3.032229 | 4.229835  | 2.005675  |
| Pd | -1.746312 | -1.857327 | -1.348789 | H  | -2.165259 | 2.784039  | 2.543672  |
| Pd | -1.397799 | -1.793021 | 1.535444  | H  | -1.688638 | 3.590763  | 1.036847  |
| Pd | -0.006721 | 0.553054  | 1.231832  | H  | -3.593493 | 4.217379  | -1.678112 |
| Pd | 0.787530  | -1.629935 | -0.089940 | H  | -2.021951 | 3.573131  | -1.161261 |
| Pd | -0.077756 | 0.567320  | -1.490570 | H  | -2.936231 | 2.764627  | -2.448126 |
| Pd | 1.925112  | 1.990415  | -0.024103 |    |           |           |           |

***trans-but-2-ene/Pd<sub>9</sub>(H<sub>2</sub>)***

|    |           |           |           |   |           |           |           |
|----|-----------|-----------|-----------|---|-----------|-----------|-----------|
| 23 |           |           |           | C | -1.235369 | -4.308950 | -1.923829 |
|    |           |           |           | C | -2.297785 | -4.595810 | -1.063284 |
| Pd | 0.340687  | 0.136206  | -0.066485 | C | -3.310408 | -3.572228 | -0.576718 |
| Pd | 0.264418  | 0.156881  | 2.649853  | C | -0.539307 | -5.343100 | -2.793587 |
| Pd | 2.648569  | -0.069867 | 1.429522  | H | -1.069908 | -3.265811 | -2.201044 |
| Pd | 1.822925  | -2.246947 | 2.691098  | H | -2.597469 | -5.642329 | -0.955300 |
| Pd | -0.548253 | -1.976358 | 1.320469  | H | -0.939993 | -5.301841 | -3.819241 |
| Pd | 1.744219  | -2.341320 | -0.044589 | H | -0.693362 | -6.360668 | -2.413555 |
| Pd | 2.114796  | -4.823397 | 1.549338  | H | 0.539862  | -5.159779 | -2.856894 |
| Pd | -0.218172 | -4.079499 | 3.097163  | H | -2.926788 | -2.548845 | -0.673245 |
| Pd | -0.398671 | -4.494186 | 0.199266  | H | -4.233833 | -3.646083 | -1.173558 |
| H  | 1.613223  | -4.039765 | 0.063753  | H | -3.587018 | -3.739824 | 0.471413  |
| H  | 0.378936  | -5.099894 | 1.852667  |   |           |           |           |

***pre-cis/Pd<sub>9</sub>(H)***

|    |           |           |           |   |           |           |           |
|----|-----------|-----------|-----------|---|-----------|-----------|-----------|
| 23 |           |           |           | C | -1.118328 | -2.286113 | -4.165791 |
|    |           |           |           | C | -2.501266 | -0.108419 | -4.554487 |
| Pd | -0.922768 | 1.513615  | 2.747802  | C | -3.768787 | -0.586091 | -3.808315 |
| Pd | -1.265652 | -1.051999 | 2.411596  | H | -0.325195 | -0.290682 | -4.604354 |
| Pd | 1.190294  | -0.076308 | 2.858378  | H | -1.812426 | -2.766894 | -3.461139 |
| Pd | -1.921470 | 0.629914  | 0.247610  | H | -0.106535 | -2.655276 | -3.961759 |
| Pd | 0.692146  | 1.555455  | 0.583582  | H | -1.404478 | -2.634962 | -5.174617 |
| Pd | 0.399399  | -1.043042 | 0.281097  | H | -2.409628 | 0.982206  | -4.460503 |
| Pd | 1.712966  | 0.471050  | -1.718441 | H | -2.624886 | -0.315660 | -5.634690 |
| Pd | -0.638962 | 2.303404  | -1.754449 | H | -4.656201 | -0.063229 | -4.187166 |
| H  | 0.361462  | 1.172404  | -2.528889 | H | -3.692758 | -0.379605 | -2.731344 |
| Pd | -0.915202 | -0.400051 | -2.099669 | H | -3.935588 | -1.663106 | -3.937505 |
| C  | -1.183365 | -0.756382 | -4.105949 |   |           |           |           |

***pre-trans/Pd<sub>9</sub>(H)***

|    |           |           |           |   |           |           |           |
|----|-----------|-----------|-----------|---|-----------|-----------|-----------|
| 23 |           |           |           | C | -1.054005 | -2.314398 | -4.187247 |
|    |           |           |           | C | -2.412446 | -0.131069 | -4.463307 |
| Pd | -1.072160 | 1.577825  | 2.878311  | H | -3.176946 | -0.391518 | -3.712820 |
| Pd | -1.347338 | -1.045547 | 2.407818  | H | -0.230078 | -0.323916 | -4.615121 |
| Pd | 1.025509  | -0.033243 | 2.798371  | H | -1.866811 | -2.775797 | -3.607253 |
| Pd | -1.738131 | 0.581991  | 0.283381  | H | -0.098081 | -2.733917 | -3.849089 |
| Pd | 0.684653  | 1.546070  | 0.636043  | H | -1.191844 | -2.628438 | -5.237375 |
| Pd | 0.485607  | -1.223804 | 0.280957  | C | -2.355728 | 1.398235  | -4.649932 |
| Pd | 1.827939  | 0.446516  | -1.658539 | H | -2.760798 | -0.591344 | -5.407590 |
| Pd | -0.566826 | 2.244095  | -1.698964 | H | -3.338416 | 1.797444  | -4.932738 |
| H  | 0.457230  | 1.057894  | -2.454009 | H | -2.039924 | 1.893809  | -3.718330 |
| Pd | -0.738727 | -0.507453 | -2.080107 | H | -1.635782 | 1.672113  | -5.433049 |
| C  | -1.076767 | -0.785117 | -4.091728 |   |           |           |           |

**but-1-ene/Pd<sub>9</sub>(H<sub>2</sub>)**

|    |           |           |           |          |           |           |           |
|----|-----------|-----------|-----------|----------|-----------|-----------|-----------|
| 23 |           |           | H         | 0.537966 | 3.021143  | -0.910799 |           |
|    |           |           | C         | 1.012287 | 3.143161  | 1.255750  |           |
| C  | -0.776863 | 1.679110  | 0.112413  | H        | -1.407355 | 1.502073  | -0.757156 |
| Pd | 1.037188  | 0.391227  | -0.359509 | H        | 2.369746  | -0.662405 | -1.175178 |
| Pd | 3.708662  | -0.836168 | -0.099109 | H        | -1.168729 | 1.343752  | 1.071119  |
| Pd | 1.542569  | -2.210779 | -1.478104 | H        | 0.264320  | -1.459754 | -0.527710 |
| Pd | 2.564291  | -3.044710 | 1.029956  | H        | 2.102318  | 3.106686  | 1.118243  |
| Pd | 0.003596  | -2.059301 | 1.050474  | C        | 0.586935  | 4.618446  | 1.478670  |
| Pd | 0.385734  | -1.789589 | 3.875699  | H        | 0.779221  | 2.551546  | 2.151632  |
| Pd | 0.886798  | -4.146443 | 2.848213  | H        | 1.110729  | 5.045439  | 2.343850  |
| Pd | 2.879100  | -2.734122 | 3.849925  | H        | 0.825698  | 5.234652  | 0.601250  |
| Pd | 2.071271  | -0.636518 | 2.095983  | H        | -0.493057 | 4.690799  | 1.659220  |
| C  | 0.316360  | 2.539687  | 0.046199  |          |           |           |           |

**n-butane/Pd<sub>9</sub>**

|    |           |           |          |          |           |           |           |
|----|-----------|-----------|----------|----------|-----------|-----------|-----------|
| 23 |           |           | Pd       | 2.550894 | 7.962807  | 3.490861  |           |
|    |           |           | Pd       | 1.795915 | 6.610303  | 5.586996  |           |
| C  | -0.370653 | -0.301797 | 0.522355 | H        | -0.303337 | -0.439120 | 2.687642  |
| C  | 0.137041  | 0.184944  | 1.895902 | H        | -0.011316 | 0.337590  | -0.294027 |
| C  | 1.676069  | 0.189372  | 2.043930 | H        | -1.467713 | -0.301293 | 0.485733  |
| C  | 2.382168  | 1.221971  | 1.141746 | H        | -0.027145 | -1.326619 | 0.323822  |
| Pd | 0.029660  | 3.443687  | 1.754328 | H        | 1.931897  | 0.397952  | 3.093121  |
| Pd | -1.759413 | 4.794566  | 3.393699 | H        | 2.060906  | -0.817818 | 1.819869  |
| Pd | -0.961314 | 5.983629  | 1.229948 | H        | 3.463289  | 1.247487  | 1.330637  |
| Pd | 1.662348  | 5.763812  | 1.953486 | H        | 1.993274  | 2.241609  | 1.343848  |
| Pd | -0.119537 | 7.043490  | 3.584996 | H        | 2.229573  | 1.009774  | 0.076213  |
| Pd | 0.854512  | 4.474810  | 4.078458 | H        | -0.242672 | 1.215510  | 2.084521  |
| Pd | 3.515875  | 5.473663  | 3.964218 |          |           |           |           |

**TS cis-but-2-ene/Pd<sub>9</sub>(H<sub>2</sub>) → pre-cis/Pd<sub>9</sub>(H)**

|    |           |           |           |          |          |           |           |
|----|-----------|-----------|-----------|----------|----------|-----------|-----------|
| 23 |           |           | C         | 2.537983 | 3.195667 | 0.849692  |           |
|    |           |           | C         | 4.009634 | 2.069921 | -0.996628 |           |
| Pd | -2.540611 | 0.226620  | 1.471743  | C        | 5.302194 | 2.074778  | -0.189795 |
| Pd | -1.943911 | 1.936603  | -0.421580 | H        | 2.049216 | 2.901332  | -1.283924 |
| Pd | -2.982825 | -0.440073 | -1.041370 | H        | 3.288683 | 2.889529  | 1.584000  |
| Pd | 0.220877  | 0.978477  | 1.139930  | H        | 1.539253 | 2.900514  | 1.232500  |
| Pd | -0.751545 | -1.518007 | 0.431782  | H        | 2.534244 | 4.295834  | 0.792041  |
| Pd | -0.235891 | 0.149947  | -1.524298 | H        | 3.805580 | 0.349866  | -1.120791 |
| Pd | 1.412327  | -2.095502 | -1.142067 | H        | 4.139428 | 2.079343  | -2.079640 |
| Pd | 1.743540  | -1.413960 | 1.647798  | H        | 6.026200 | 1.364975  | -0.603166 |
| H  | 2.481914  | -1.530979 | 0.111558  | H        | 5.137033 | 1.814895  | 0.859961  |
| Pd | 2.372188  | 0.441923  | -0.433952 | H        | 5.752596 | 3.077883  | -0.226856 |
| C  | 2.769360  | 2.596219  | -0.522108 |          |          |           |           |

|                |           |      |      |      |       |       |       |       |       |       |       |       |       |      |
|----------------|-----------|------|------|------|-------|-------|-------|-------|-------|-------|-------|-------|-------|------|
| 1              | 4         | 46   | 0.00 | 0.00 | 0.00  | 14    | 6     | 0.02  | 0.02  | 0.00  |       |       |       |      |
| A              | 5         | 46   | 0.00 | 0.00 | 0.00  | 15    | 1     | 0.03  | 0.04  | 0.00  |       |       |       |      |
| Frequencies -- | -684.3212 | 6    | 46   | 0.00 | 0.00  | 0.00  | 16    | 1     | 0.00  | 0.00  | 0.00  |       |       |      |
| Red. masses -- | 1.1953    | 7    | 46   | 0.00 | 0.00  | 0.00  | 17    | 1     | 0.00  | 0.00  | 0.00  |       |       |      |
| Frc consts --  | 0.3298    | 8    | 46   | 0.00 | 0.00  | 0.00  | 18    | 1     | 0.00  | -0.01 | -0.02 |       |       |      |
| IR Inten --    | 98.4038   | 9    | 1    | 0.02 | -0.02 | 0.00  | 19    | 1     | 0.25  | 0.93  | 0.03  |       |       |      |
| Atom AN        | X         | Y    | Z    | 10   | 46    | -0.01 | 0.01  | 0.00  | 20    | 1     | 0.07  | 0.21  | -0.02 |      |
| 1              | 46        | 0.00 | 0.00 | 0.00 | 11    | 6     | -0.03 | -0.05 | 0.01  | 21    | 1     | 0.05  | 0.04  | 0.02 |
| 2              | 46        | 0.00 | 0.00 | 0.00 | 12    | 6     | 0.00  | -0.01 | 0.00  | 22    | 1     | 0.00  | 0.00  | 0.00 |
| 3              | 46        | 0.00 | 0.00 | 0.00 | 13    | 6     | 0.02  | -0.10 | -0.03 | 23    | 1     | -0.03 | 0.03  | 0.01 |

**TS pre-trans/Pd<sub>9</sub>(H) → trans-but-2-ene/Pd<sub>9</sub>(H<sub>2</sub>)**

|    |           |           |           |          |           |           |          |
|----|-----------|-----------|-----------|----------|-----------|-----------|----------|
| 23 |           |           | Pd        | 0.207136 | -4.252333 | 2.689536  |          |
|    |           |           | C         | 0.465790 | -4.945736 | 4.775738  |          |
| Pd | 0.455967  | 0.109732  | -0.438427 | C        | 1.391813  | -4.051625 | 5.583659 |
| Pd | 0.643191  | 0.338996  | 2.186271  | C        | -0.942497 | -4.687627 | 4.665668 |
| Pd | 2.837242  | 0.047999  | 2.182835  | H        | -1.301234 | -3.792309 | 5.179363 |
| Pd | -0.563146 | -1.960560 | 1.241174  | H        | 0.788299  | -5.982647 | 4.656941 |
| Pd | 1.681148  | -2.355044 | -0.180976 | H        | 1.076352  | -3.001232 | 5.545490 |
| Pd | 1.990512  | -2.026545 | 2.428271  | H        | 2.423425  | -4.113869 | 5.221060 |
| Pd | 2.636634  | -4.448927 | 1.294133  | H        | 1.393628  | -4.362536 | 6.642290 |
| Pd | -0.174203 | -4.322435 | -0.061711 | H        | -1.290614 | -3.954143 | 3.227323 |
| H  | 1.052107  | -4.996988 | 0.978502  | C        | -1.951002 | -5.832751 | 4.581720 |

Supplementary Material (ESI) for PCCP  
This journal is © the Owner Societies 2009

|   |           |           |          |   |           |           |          |
|---|-----------|-----------|----------|---|-----------|-----------|----------|
| H | -2.171225 | -6.197430 | 5.595872 | H | -1.551566 | -6.669380 | 3.997681 |
| H | -2.893479 | -5.515483 | 4.122344 |   |           |           |          |

|                |           |      |      |      |    |      |       |       |       |    |      |       |       |       |
|----------------|-----------|------|------|------|----|------|-------|-------|-------|----|------|-------|-------|-------|
| 1              |           |      |      | 4    | 46 | 0.00 | 0.00  | 0.00  | 14    | 1  | 0.15 | -0.15 | -0.03 |       |
| A              |           |      |      | 5    | 46 | 0.00 | 0.00  | 0.00  | 15    | 1  | 0.02 | -0.02 | 0.02  |       |
| Frequencies -- | -843.1552 |      |      | 6    | 46 | 0.00 | 0.00  | 0.00  | 16    | 1  | 0.00 | 0.00  | -0.01 |       |
| Red. masses -- | 1.1527    |      |      | 7    | 46 | 0.00 | 0.00  | 0.00  | 17    | 1  | 0.02 | -0.01 | 0.00  |       |
| Frc consts --  | 0.4828    |      |      | 8    | 46 | 0.00 | 0.00  | 0.00  | 18    | 1  | 0.01 | 0.00  | 0.01  |       |
| IR Inten --    | 133.8897  |      |      | 9    | 1  | 0.00 | -0.02 | 0.03  | 19    | 1  | 0.71 | -0.59 | -0.30 |       |
| Atom AN        | X         | Y    | Z    | 10   | 46 | 0.00 | 0.00  | -0.01 | 20    | 6  | 0.02 | -0.01 | 0.00  |       |
| 1              | 46        | 0.00 | 0.00 | 0.00 | 11 | 6    | -0.03 | 0.03  | -0.01 | 21 | 1    | 0.02  | 0.00  | -0.03 |
| 2              | 46        | 0.00 | 0.00 | 0.00 | 12 | 6    | 0.01  | 0.00  | 0.00  | 22 | 1    | 0.05  | -0.01 | 0.01  |
| 3              | 46        | 0.00 | 0.00 | 0.00 | 13 | 6    | -0.06 | 0.03  | 0.07  | 23 | 1    | -0.01 | 0.00  | 0.00  |

**TS pre-cis/Pd<sub>9</sub>(H) → but-1-ene/Pd<sub>9</sub>(H<sub>2</sub>)**

|    |           |           |           |    |           |           |           |
|----|-----------|-----------|-----------|----|-----------|-----------|-----------|
| 23 |           |           |           | Pd | -2.978598 | -0.495815 | -1.050562 |
|    |           |           |           | Pd | -2.539025 | 0.266884  | 1.434197  |
| C  | 2.569284  | 3.167897  | 0.832939  | H  | 2.488433  | -1.538317 | 0.150870  |
| C  | 2.722586  | 2.598170  | -0.564515 | H  | 1.980479  | 2.935918  | -1.290622 |
| C  | 3.929446  | 2.039026  | -1.068652 | H  | 3.372199  | 2.800698  | 1.485141  |
| H  | 4.816379  | 2.015237  | -0.437331 | H  | 1.609662  | 2.806057  | 1.269519  |
| Pd | 2.365956  | 0.427896  | -0.465863 | C  | 2.543200  | 4.717999  | 0.835611  |
| Pd | 1.748317  | -1.351898 | 1.677200  | H  | 3.833165  | 0.301699  | -1.072591 |
| Pd | 1.428853  | -2.132421 | -1.092468 | H  | 4.111953  | 2.039129  | -2.141010 |
| Pd | -0.234129 | 0.095812  | -1.559827 | H  | 2.398530  | 5.096581  | 1.855182  |
| Pd | -0.736272 | -1.500349 | 0.453777  | H  | 3.484870  | 5.127582  | 0.447891  |
| Pd | 0.214353  | 1.026384  | 1.082370  | H  | 1.723165  | 5.099128  | 0.213201  |
| Pd | -1.951129 | 1.909441  | -0.520654 |    |           |           |           |

|                |           |       |       |       |    |       |      |       |      |    |      |       |       |      |
|----------------|-----------|-------|-------|-------|----|-------|------|-------|------|----|------|-------|-------|------|
| 1              |           |       |       | 4     | 1  | 0.06  | 0.16 | -0.04 | 14   | 1  | 0.02 | -0.01 | -0.01 |      |
| A              |           |       |       | 5     | 46 | -0.01 | 0.00 | 0.00  | 15   | 1  | 0.02 | 0.01  | -0.01 |      |
| Frequencies -- | -724.3574 |       |       | 6     | 46 | 0.00  | 0.00 | 0.00  | 16   | 1  | 0.00 | 0.00  | 0.00  |      |
| Red. masses -- | 1.1355    |       |       | 7     | 46 | 0.00  | 0.00 | 0.00  | 17   | 1  | 0.00 | 0.00  | 0.00  |      |
| Frc consts --  | 0.3510    |       |       | 8     | 46 | 0.00  | 0.00 | 0.00  | 18   | 6  | 0.00 | 0.00  | 0.00  |      |
| IR Inten --    | 162.0824  |       |       | 9     | 46 | 0.00  | 0.00 | 0.00  | 19   | 1  | 0.24 | 0.92  | -0.11 |      |
| Atom AN        | X         | Y     | Z     | 10    | 46 | 0.00  | 0.00 | 0.00  | 20   | 1  | 0.07 | 0.18  | -0.03 |      |
| 1              | 6         | 0.00  | 0.00  | 0.00  | 11 | 46    | 0.00 | 0.00  | 0.00 | 21 | 1    | 0.00  | -0.01 | 0.00 |
| 2              | 6         | -0.02 | -0.05 | 0.01  | 12 | 46    | 0.00 | 0.00  | 0.00 | 22 | 1    | 0.00  | 0.00  | 0.00 |
| 3              | 6         | 0.04  | -0.08 | -0.01 | 13 | 46    | 0.00 | 0.00  | 0.00 | 23 | 1    | 0.00  | 0.00  | 0.00 |

**TS pre-cis/Pd<sub>9</sub>(H) → n-butane/Pd<sub>9</sub>**

|    |           |           |           |   |           |           |          |
|----|-----------|-----------|-----------|---|-----------|-----------|----------|
| 23 |           |           |           | C | -0.316887 | -5.905095 | 4.810837 |
|    |           |           |           | C | -1.271507 | -7.110147 | 2.686969 |
| Pd | 0.096798  | 0.258721  | 0.132023  | C | -2.663575 | -6.445734 | 2.730257 |
| Pd | 0.497445  | 0.076931  | 2.826417  | H | 0.793403  | -6.921401 | 3.279259 |
| Pd | 2.627042  | -0.082945 | 1.065962  | H | -1.158690 | -5.216652 | 4.967000 |
| Pd | -1.085440 | -1.831446 | 1.604726  | H | 0.587934  | -5.441827 | 5.220706 |
| Pd | 1.288368  | -2.122479 | -0.021687 | H | -0.530670 | -6.809674 | 5.407290 |
| Pd | 1.664810  | -2.273983 | 2.575542  | H | -1.004120 | -7.324911 | 1.643921 |
| Pd | 1.936964  | -4.686942 | 1.099056  | H | -1.326841 | -8.085795 | 3.203160 |
| Pd | -0.504053 | -4.087129 | -0.108105 | H | -3.407614 | -7.085460 | 2.237858 |
| H  | 0.698182  | -5.500508 | 2.254704  | H | -2.651299 | -5.478705 | 2.207017 |
| Pd | -0.304475 | -4.191414 | 2.618238  | H | -3.001458 | -6.272768 | 3.760180 |
| C  | -0.120386 | -6.314501 | 3.336562  |   |           |           |          |

|                |           |      |      |      |    |       |       |       |       |    |       |       |       |      |
|----------------|-----------|------|------|------|----|-------|-------|-------|-------|----|-------|-------|-------|------|
| 1              |           |      |      | 4    | 46 | 0.00  | 0.00  | 0.00  | 14    | 6  | 0.00  | 0.00  | 0.00  |      |
| A              |           |      |      | 5    | 46 | 0.00  | 0.00  | 0.00  | 15    | 1  | 0.28  | 0.08  | -0.08 |      |
| Frequencies -- | -907.5420 |      |      | 6    | 46 | 0.00  | 0.00  | 0.00  | 16    | 1  | -0.01 | -0.03 | 0.01  |      |
| Red. masses -- | 1.0820    |      |      | 7    | 46 | 0.00  | 0.00  | 0.00  | 17    | 1  | 0.00  | 0.01  | 0.00  |      |
| Frc consts --  | 0.5250    |      |      | 8    | 46 | 0.00  | 0.00  | 0.00  | 18    | 1  | -0.01 | -0.02 | 0.02  |      |
| IR Inten --    | 6.4386    |      |      | 9    | 1  | 0.69  | 0.64  | -0.12 | 19    | 1  | 0.02  | 0.00  | 0.01  |      |
| Atom AN        | X         | Y    | Z    | 10   | 46 | -0.01 | 0.00  | 0.00  | 20    | 1  | 0.00  | 0.01  | 0.01  |      |
| 1              | 46        | 0.00 | 0.00 | 0.00 | 11 | 6     | 0.01  | -0.07 | -0.02 | 21 | 1     | 0.00  | 0.00  | 0.00 |
| 2              | 46        | 0.00 | 0.00 | 0.00 | 12 | 6     | -0.01 | -0.01 | 0.00  | 22 | 1     | 0.00  | 0.00  | 0.00 |
| 3              | 46        | 0.00 | 0.00 | 0.00 | 13 | 6     | 0.01  | 0.00  | 0.00  | 23 | 1     | 0.00  | 0.00  | 0.00 |

**cis-but-2-ene/Pd<sub>9</sub>(H<sub>2</sub>)/nanotube**

179

|  |   |           |           |           |
|--|---|-----------|-----------|-----------|
|  | C | 4.144397  | -1.221632 | -3.838280 |
|  | C | 7.010290  | -0.502795 | 0.434455  |
|  | C | 6.943035  | -0.606487 | -0.973251 |
|  | C | 4.735415  | -0.644983 | 3.939882  |
|  | C | 5.860861  | -0.518068 | 2.979263  |
|  | C | -0.486727 | -2.805256 | 1.886668  |
|  | C | -0.108780 | -2.993720 | -2.189806 |
|  | C | -0.777644 | -3.032820 | -0.916674 |
|  | C | 3.639936  | -2.540062 | -3.871716 |
|  | C | 2.251064  | -2.749089 | -3.738069 |
|  | C | 6.909781  | -1.885493 | -1.567528 |
|  | C | 6.133218  | -2.080940 | -2.728327 |
|  | C | 6.461403  | -1.702250 | 2.481772  |
|  | C | 7.060544  | -1.684694 | 1.204689  |
|  | C | 4.255171  | -1.923445 | 4.249090  |
|  | C | -0.632320 | -4.219127 | -0.114618 |
|  | C | -0.490302 | -4.113912 | 1.265222  |
|  | C | 1.788146  | -4.051325 | -3.420511 |
|  | C | 0.611582  | -4.211543 | -2.645770 |
|  | C | 5.792205  | -3.394443 | -3.106933 |
|  | C | 4.521154  | -3.629382 | -3.689838 |
|  | C | 7.403659  | -2.907683 | 0.584831  |
|  | C | 7.324977  | -3.009423 | -0.827248 |
|  | C | 5.102555  | -3.104893 | 3.966799  |
|  | C | 6.212200  | -2.955630 | 3.097053  |
|  | C | -0.063271 | -5.316711 | 2.039494  |
|  | C | 0.322832  | -5.470241 | -2.058700 |
|  | C | -0.323583 | -5.510160 | -0.789118 |
|  | C | 4.032872  | -4.955633 | -3.774417 |
|  | C | 2.631794  | -5.172563 | -3.635265 |
|  | C | 7.333211  | -4.288720 | -1.436840 |
|  | C | 6.543294  | -4.487357 | -2.607542 |
|  | C | 6.894776  | -4.114871 | 2.642836  |
|  | C | 7.510363  | -4.087908 | 1.358932  |
|  | C | 4.641148  | -4.407810 | 4.297780  |
|  | C | -0.351703 | -6.666129 | 0.018728  |
|  | C | -0.219184 | -6.570485 | 1.412235  |
|  | C | 2.092328  | -6.454738 | -3.400585 |
|  | C | 0.951058  | -6.602412 | -2.611258 |
|  | C | 6.218414  | -5.771917 | -3.086476 |
|  | C | 4.971126  | -6.004275 | -3.670240 |
|  | C | 7.940319  | -5.261880 | 0.704357  |
|  | C | 7.847692  | -5.363148 | -0.685229 |
|  | C | 5.555420  | -5.468731 | 4.155109  |
|  | C | 6.680332  | -5.320151 | 3.343610  |
|  | C | -2.052656 | 5.688783  | 0.577495  |
|  | C | -2.175388 | 5.554260  | -0.813438 |
|  | C | -0.398539 | 6.112116  | 2.989894  |
|  | C | 0.842924  | 6.326553  | 3.608350  |
|  | C | 3.739975  | 6.685862  | 3.316456  |
|  | C | 4.878103  | 6.763989  | 2.513471  |
|  | C | 6.160142  | 6.722795  | -0.115109 |
|  | C | 6.068971  | 6.606815  | -1.503652 |
|  | C | 4.432007  | 6.202238  | -3.900248 |
|  | C | 3.181505  | 5.982669  | -4.482154 |
|  | C | 0.291029  | 5.606857  | -4.219593 |
|  | C | -0.860040 | 5.519253  | -3.436053 |
|  | H | 3.241949  | -6.798596 | 4.760351  |
|  | H | 1.148499  | -7.205910 | 3.705394  |
|  | H | -0.296864 | -7.655208 | -0.410391 |
|  | H | -0.075906 | -7.492907 | 1.954587  |
|  | H | 2.614806  | -7.356931 | -3.678599 |
|  | H | 0.674087  | -7.606090 | -2.326186 |
|  | H | 6.833706  | -6.633606 | -2.876638 |
|  | H | 4.710274  | -7.030744 | -3.876677 |
|  | H | 8.196009  | -6.160153 | 1.244605  |
|  | H | 8.030905  | -6.332394 | -1.123619 |
|  | H | 5.346990  | -6.458306 | 4.532604  |
|  | H | 7.268517  | -6.205373 | 3.158026  |
|  | H | -2.192357 | 6.676364  | 0.988477  |
|  | H | -2.399236 | 6.450468  | -1.371990 |
|  | H | -0.978433 | 6.988187  | 2.741590  |
|  | H | 1.127328  | 7.352292  | 3.787671  |
|  | H | 3.243886  | 7.613056  | 3.560127  |
|  | H | 5.187410  | 7.748918  | 2.199998  |
|  | H | 6.134992  | 7.720188  | 0.295719  |
|  | H | 5.972719  | 7.520105  | -2.070982 |

|    |           |           |           |   |            |           |           |
|----|-----------|-----------|-----------|---|------------|-----------|-----------|
| H  | 4.766018  | 7.225446  | -3.818890 | C | -8.483353  | -3.263352 | -0.263161 |
| H  | 2.637021  | 6.852405  | -4.815867 | C | -9.491127  | -2.160930 | -0.000312 |
| H  | 0.533742  | 6.576500  | -4.625924 | C | -7.440792  | -3.396457 | 2.110724  |
| H  | -1.423364 | 6.427351  | -3.283441 | H | -8.630925  | -3.815108 | -1.194945 |
| Pd | -3.370295 | -1.927358 | -1.064865 | H | -7.090435  | -4.730911 | 0.377875  |
| Pd | -4.816569 | -0.876461 | 1.028270  | H | -8.011441  | -4.089280 | 2.749984  |
| Pd | -3.492034 | 1.407610  | 2.030702  | H | -6.392256  | -3.449128 | 2.428580  |
| Pd | -3.815119 | 0.851024  | -0.892149 | H | -7.800640  | -2.381769 | 2.307186  |
| Pd | -5.294795 | -0.711621 | -2.827726 | H | -10.475166 | -2.596757 | 0.235613  |
| Pd | -6.500721 | 0.555147  | -0.480744 | H | -9.199976  | -1.515874 | 0.834891  |
| Pd | -5.118017 | 2.826396  | 0.412728  | H | -9.617818  | -1.530341 | -0.888230 |
| Pd | -6.327429 | -2.485460 | -0.826382 | H | -4.930554  | -2.202372 | -1.914849 |
| Pd | -6.093697 | 1.064360  | 2.252229  | H | -6.592308  | -0.748112 | -1.630038 |
| C  | -7.586574 | -3.795588 | 0.654381  |   |            |           |           |

***trans-but-2-ene/Pd<sub>9</sub>(H<sub>2</sub>)/nanotube***

|     |           |           |           |   |           |           |           |
|-----|-----------|-----------|-----------|---|-----------|-----------|-----------|
| 179 |           |           |           | C | 1.774215  | 5.270090  | 3.765925  |
| C   | 2.656543  | -5.932993 | 4.452655  | C | 3.184722  | 5.431863  | 3.608724  |
| C   | 3.226149  | -4.641726 | 4.459776  | C | -0.882406 | -0.356359 | 1.733303  |
| C   | 2.295335  | -3.507443 | 4.237453  | C | -0.505666 | -0.574227 | -2.339223 |
| C   | 1.073501  | -3.736273 | 3.592916  | C | -1.199693 | -0.591901 | -1.086906 |
| C   | 0.715065  | -5.123662 | 3.201152  | C | 3.264425  | -0.136462 | -4.039193 |
| C   | 1.421794  | -6.170726 | 3.828938  | C | 1.870250  | -0.331846 | -3.914928 |
| C   | 2.790545  | -2.131624 | 4.387152  | C | 6.540779  | 0.501067  | -1.733783 |
| C   | 1.917801  | -1.051195 | 4.187350  | C | 5.763690  | 0.307356  | -2.897995 |
| C   | 0.637092  | -1.281560 | 3.458782  | C | 6.090564  | 0.715955  | 2.325508  |
| C   | 0.313503  | -2.580351 | 3.051232  | C | 6.682325  | 0.713418  | 1.040853  |
| C   | 2.462779  | 0.317710  | 4.227526  | C | 3.846213  | 0.511967  | 4.112801  |
| C   | 1.551341  | 1.455246  | 4.007577  | C | -1.171012 | -1.797950 | -0.281438 |
| C   | 0.270255  | 1.209510  | 3.284401  | C | -0.966454 | -1.669430 | 1.153828  |
| C   | -0.048449 | -0.149800 | 2.878194  | C | 1.385501  | -1.628847 | -3.615695 |
| C   | 2.075126  | 2.755575  | 4.041737  | C | 0.143357  | -1.769400 | -2.806869 |
| C   | 1.210776  | 3.898076  | 3.717213  | C | 5.405485  | -1.005039 | -3.268895 |
| C   | -0.016203 | 3.677917  | 3.079127  | C | 4.135315  | -1.232601 | -3.844300 |
| C   | -0.412296 | 2.288256  | 2.726689  | C | 7.003437  | -0.518698 | 0.426749  |
| C   | -1.279356 | 2.105372  | 1.578899  | C | 6.935940  | -0.623262 | -0.980895 |
| C   | -1.597330 | 3.271261  | 0.759188  | C | 4.731378  | -0.651237 | 3.934894  |
| C   | -1.544818 | 4.637118  | 1.356131  | C | 5.855811  | -0.528491 | 2.972499  |
| C   | -0.750255 | 4.840345  | 2.514882  | C | -0.496121 | -2.797808 | 1.884742  |
| C   | -1.387214 | 0.787140  | 0.997028  | C | 0.123009  | -2.991340 | -2.191292 |
| C   | -1.563346 | 0.666269  | -0.454412 | C | -0.792250 | -3.027571 | -0.918174 |
| C   | -1.537089 | 1.860375  | -1.261888 | C | 3.626942  | -2.549567 | -3.875837 |
| C   | -1.727345 | 3.144052  | -0.618551 | C | 2.237768  | -2.754350 | -3.739826 |
| C   | -0.839318 | 1.849076  | -2.526612 | C | 6.899174  | -1.902655 | -1.574161 |
| C   | -0.486116 | 3.153254  | -3.150034 | C | 6.122224  | -2.096737 | -2.734895 |
| C   | -1.136080 | 4.342632  | -2.731673 | C | 6.452470  | -1.714827 | 2.475563  |
| C   | -1.789007 | 4.366196  | -1.465738 | C | 7.050686  | -1.700136 | 1.197971  |
| C   | -0.220109 | 0.686951  | -2.976311 | C | 4.247881  | -1.928018 | 4.245931  |
| C   | 1.028972  | 0.800721  | -3.780423 | C | -0.648957 | -4.213348 | -0.114769 |
| C   | 1.527309  | 2.094879  | -4.069368 | C | -0.504553 | -4.107100 | 1.264745  |
| C   | 0.702731  | 3.237906  | -3.918583 | C | 1.771199  | -4.055029 | -3.421214 |
| C   | 2.919601  | 2.278661  | -4.204994 | C | 0.594556  | -4.211409 | -2.645848 |
| C   | 3.446159  | 3.589426  | -4.188892 | C | 5.777245  | -3.409571 | -3.112307 |
| C   | 2.597730  | 4.695034  | -4.437953 | C | 4.505132  | -3.641311 | -3.694061 |
| C   | 1.191288  | 4.515359  | -4.299085 | C | 7.390084  | -2.924632 | 0.579072  |
| C   | 3.782211  | 1.178083  | -4.008964 | C | 7.311027  | -3.027253 | -0.832923 |
| C   | 5.053499  | 1.401153  | -3.434326 | C | 5.091506  | -3.112141 | 3.963718  |
| C   | 5.419198  | 2.713144  | -3.066392 | C | 6.200460  | -2.966890 | 3.092397  |
| C   | 4.720977  | 3.810182  | -3.608780 | C | -0.080569 | -5.310509 | 2.039787  |
| C   | 6.197629  | 2.906123  | -1.906482 | C | 0.302321  | -5.468810 | -2.057863 |
| C   | 6.258662  | 4.190535  | -1.331965 | C | -0.344043 | -5.505897 | -0.788131 |
| C   | 5.910190  | 5.324617  | -2.107079 | C | 4.012817  | -4.966199 | -3.776922 |
| C   | 5.116686  | 5.129434  | -3.275900 | C | 2.611275  | -5.178898 | -3.636083 |
| C   | 6.585294  | 1.782054  | -1.147205 | C | 7.315547  | -4.307055 | -1.441541 |
| C   | 6.652264  | 1.891571  | 0.260091  | C | 6.525240  | -4.504253 | -2.612181 |
| C   | 6.346678  | 3.130398  | 0.863923  | C | 6.879259  | -4.128505 | 2.638678  |
| C   | 6.336359  | 4.305846  | 0.079088  | C | 7.493735  | -4.104550 | 1.354172  |
| C   | 5.743208  | 3.146427  | 2.138952  | C | 4.626711  | -4.413400 | 4.296424  |
| C   | 5.132014  | 4.346102  | 2.585031  | C | -0.374364 | -6.661044 | 0.020745  |
| C   | 5.461158  | 5.580710  | 1.965843  | C | -0.240480 | -6.564436 | 1.413975  |
| C   | 6.084660  | 5.559714  | 0.685721  | C | 2.068222  | -6.459328 | -3.400135 |
| C   | 5.498791  | 1.917603  | 2.802949  | C | 0.927028  | -6.603160 | -2.609943 |
| C   | 4.366505  | 1.843844  | 3.760921  | C | 6.196464  | -5.788244 | -3.090015 |
| C   | 3.532460  | 2.959352  | 3.903825  | C | 4.948074  | -6.017492 | -3.672590 |
| C   | 4.008927  | 4.285241  | 3.447964  | C | 7.919777  | -5.280395 | 0.700417  |
|     |           |           |           | C | 7.826646  | -5.382487 | -0.689046 |

Supplementary Material (ESI) for PCCP  
This journal is © the Owner Societies 2009

|   |           |           |           |    |            |           |           |
|---|-----------|-----------|-----------|----|------------|-----------|-----------|
| C | 5.537791  | -5.477049 | 4.153926  | H  | 5.205500   | 7.739719  | 2.186611  |
| C | 6.662253  | -5.332441 | 3.341052  | H  | 6.150197   | 7.706674  | 0.281302  |
| C | -2.039141 | 5.698202  | 0.569520  | H  | 5.987245   | 7.505161  | -2.085093 |
| C | -2.164747 | 5.563380  | -0.821081 | H  | 4.780055   | 7.212578  | -3.833060 |
| C | -0.382326 | 6.120056  | 2.980890  | H  | 2.649630   | 6.844411  | -4.829191 |
| C | 0.859382  | 6.331501  | 3.599748  | H  | 0.545553   | 6.574953  | -4.636150 |
| C | 3.756958  | 6.681954  | 3.306446  | H  | -1.411257  | 6.432657  | -3.292119 |
| C | 4.893870  | 6.755980  | 2.501428  | Pd | -3.381202  | -1.920816 | -1.039321 |
| C | 6.172751  | 6.708882  | -0.128629 | Pd | -4.810283  | -0.842155 | 1.051279  |
| C | 6.081188  | 6.592089  | -1.517043 | Pd | -3.489407  | 1.437024  | 2.037297  |
| C | 4.443208  | 6.190220  | -3.913345 | Pd | -3.818038  | 0.871336  | -0.890780 |
| C | 3.191841  | 5.973599  | -4.494551 | Pd | -5.315741  | -0.717627 | -2.799353 |
| C | 0.300349  | 5.606427  | -4.228621 | Pd | -6.506243  | 0.581912  | -0.455999 |
| C | -0.850592 | 5.522842  | -3.444296 | Pd | -5.115699  | 2.853839  | 0.418824  |
| H | 3.220577  | -6.799623 | 4.762573  | Pd | -6.327959  | -2.458017 | -0.745692 |
| H | 1.125702  | -7.201798 | 3.707880  | Pd | -6.083061  | 1.101533  | 2.276256  |
| H | -0.321786 | -7.650634 | -0.407457 | C  | -7.645721  | -3.760240 | 0.668575  |
| H | -0.099000 | -7.486713 | 1.957051  | C  | -8.466290  | -2.743710 | 0.200949  |
| H | 2.587786  | -7.363232 | -3.678001 | C  | -9.450956  | -2.895221 | -0.945307 |
| H | 0.647222  | -7.605865 | -2.324237 | C  | -6.984916  | -3.778228 | 2.036668  |
| H | 6.809388  | -6.651540 | -2.879860 | H  | -6.606593  | -0.704526 | -1.608990 |
| H | 4.683994  | -7.043416 | -3.877624 | H  | -7.662007  | -4.715388 | 0.134857  |
| H | 8.172709  | -6.179086 | 1.241278  | H  | -7.555162  | -4.428871 | 2.719254  |
| H | 8.006675  | -6.352699 | -1.126629 | H  | -5.962516  | -4.173544 | 1.990268  |
| H | 5.326876  | -6.465603 | 4.532734  | H  | -6.944895  | -2.774351 | 2.476095  |
| H | 7.247888  | -6.219449 | 3.155954  | H  | -10.471340 | -3.018625 | -0.548540 |
| H | -2.176149 | 6.687366  | 0.979770  | H  | -9.219673  | -3.772723 | -1.561641 |
| H | -2.387411 | 6.459465  | -1.380342 | H  | -9.457090  | -2.011425 | -1.594040 |
| H | -0.959510 | 6.997554  | 2.731253  | H  | -4.954158  | -2.200860 | -1.869923 |
| H | 1.146764  | 7.356645  | 3.777732  | H  | -8.586045  | -1.853068 | 0.821005  |
| H | 3.264102  | 7.610809  | 3.550353  |    |            |           |           |

**pre-cis/Pd<sub>9</sub>(H)/nanotube**

|     |           |           |           |   |           |           |           |
|-----|-----------|-----------|-----------|---|-----------|-----------|-----------|
| 179 |           |           |           | C | 5.198661  | -3.263936 | 3.755299  |
|     |           |           |           | C | 6.548980  | -2.207877 | 2.036158  |
| C   | 1.866575  | 5.848521  | -4.602067 | C | 6.800899  | -3.486898 | 1.502704  |
| C   | 2.612061  | 4.650369  | -4.572632 | C | 6.611336  | -4.635387 | 2.310914  |
| C   | 1.848877  | 3.402584  | -4.321435 | C | 5.785844  | -4.521262 | 3.468104  |
| C   | 0.600561  | 3.474045  | -3.691345 | C | 6.779790  | -1.063176 | 1.244734  |
| C   | 0.046140  | 4.806639  | -3.340450 | C | 6.879393  | -1.204486 | -0.157801 |
| C   | 0.605465  | 5.926380  | -3.990824 | C | 6.759406  | -2.491855 | -0.724602 |
| C   | 2.534582  | 2.106827  | -4.427730 | C | 6.908072  | -3.632532 | 0.096399  |
| C   | 1.821230  | 0.920231  | -4.200586 | C | 6.176973  | -2.631987 | -2.001801 |
| C   | 0.508440  | 0.986814  | -3.496337 | C | 5.744082  | -3.918959 | -2.412601 |
| C   | 0.002822  | 2.236912  | -3.126531 | C | 6.237539  | -5.075312 | -1.753039 |
| C   | 2.553352  | -0.358324 | -4.194840 | C | 6.842111  | -4.927193 | -0.472122 |
| C   | 1.808485  | -1.606395 | -3.949437 | C | 5.769501  | -1.470727 | -2.705900 |
| C   | 0.488070  | -1.525694 | -3.259307 | C | 4.647555  | -1.586439 | -3.671577 |
| C   | -0.026350 | -0.217078 | -2.898052 | C | 3.979696  | -2.812041 | -3.783900 |
| C   | 2.510164  | -2.819909 | -3.939849 | C | 4.632163  | -4.043187 | -3.283369 |
| C   | 1.809910  | -4.064672 | -3.596906 | C | 2.563146  | -5.343481 | -3.596789 |
| C   | 0.548976  | -4.005432 | -2.989985 | C | 3.979651  | -5.299054 | -3.415434 |
| C   | -0.047909 | -2.678097 | -2.681129 | C | -0.909354 | -0.100067 | -1.776091 |
| C   | -0.945594 | -2.592252 | -1.552425 | C | -0.582889 | 0.271996  | 2.294290  |
| C   | -1.112188 | -3.764279 | -0.709489 | C | -1.250920 | 0.152314  | 1.038867  |
| C   | -0.860984 | -5.125619 | -1.266013 | C | 3.178493  | 0.440713  | 4.047805  |
| C   | -0.025066 | -5.245384 | -2.406919 | C | 1.771954  | 0.428047  | 3.908302  |
| C   | -1.284149 | -1.289941 | -1.020737 | C | 6.543009  | 0.215088  | 1.789881  |
| C   | -1.440618 | -1.153386 | 0.446362  | C | 5.729877  | 0.329654  | 2.939940  |
| C   | -1.210526 | -2.309757 | 1.267510  | C | 6.181602  | -0.183542 | -2.263314 |
| C   | -1.243889 | -3.618785 | 0.668448  | C | 6.751647  | -0.058136 | -0.975015 |
| C   | -0.553615 | -2.165645 | 2.535117  | C | 3.949011  | -0.352330 | -4.067711 |
| C   | -0.031570 | -3.385370 | 3.206025  | C | -1.415144 | 1.331877  | 0.207419  |
| C   | -0.497350 | -4.666593 | 2.815028  | C | -1.171382 | 1.201987  | -1.224533 |
| C   | -1.132274 | -4.815534 | 1.548101  | C | 1.107046  | 1.631892  | 3.565831  |
| C   | -0.126039 | -0.910613 | 2.969387  | C | -0.130339 | 1.567694  | 2.740179  |
| C   | 1.106520  | -0.818410 | 3.799428  | C | 5.179944  | 1.586844  | 3.264829  |
| C   | 1.784005  | -2.018378 | 4.130290  | C | 3.883321  | 1.645137  | 3.823258  |
| C   | 1.138823  | -3.274161 | 3.998469  | C | 6.886054  | 1.225106  | -0.397258 |
| C   | 3.185964  | -1.993296 | 4.286388  | C | 6.782939  | 1.361371  | 1.005501  |
| C   | 3.897581  | -3.213552 | 4.316376  | C | 4.660385  | 0.928815  | -3.922782 |
| C   | 3.215026  | -4.423372 | 4.589742  | C | 5.781428  | 0.995084  | -2.951122 |
| C   | 1.800704  | -4.455852 | 4.423100  | C | -0.844071 | 2.368172  | -1.974110 |
| C   | 3.882061  | -0.785224 | 4.063117  | C | -0.576882 | 2.718634  | 2.101443  |
| C   | 5.179352  | -0.838677 | 3.505663  | C | -1.251266 | 2.625359  | 0.823025  |
| C   | 5.736651  | -2.094270 | 3.183290  | C | 3.189052  | 2.874770  | 3.809490  |

Supplementary Material (ESI) for PCCP  
This journal is © the Owner Societies 2009

|   |           |           |           |    |           |           |           |
|---|-----------|-----------|-----------|----|-----------|-----------|-----------|
| C | 1.785909  | 2.871818  | 3.660984  | H  | 2.305765  | 6.777787  | -4.931838 |
| C | 6.552819  | 2.639360  | 1.556919  | H  | 0.166957  | 6.908488  | -3.898483 |
| C | 5.737911  | 2.754147  | 2.702129  | H  | -1.419073 | 7.253272  | 0.178325  |
| C | 6.199302  | 2.268377  | -2.487845 | H  | -1.118550 | 7.060882  | -2.175613 |
| C | 6.776228  | 2.377427  | -1.205129 | H  | 1.463375  | 7.478099  | 3.469742  |
| C | 4.004718  | 2.114816  | -4.275560 | H  | -0.485301 | 7.398883  | 2.107924  |
| C | -1.247306 | 3.799182  | -0.019362 | H  | 5.754106  | 7.363002  | 2.702772  |
| C | -1.046829 | 3.677753  | -1.390516 | H  | 3.583288  | 7.472643  | 3.671525  |
| C | 1.137825  | 4.080937  | 3.302729  | H  | 7.249118  | 6.967373  | -1.378966 |
| C | -0.045680 | 4.042700  | 2.522063  | H  | 7.017218  | 7.186875  | 0.979820  |
| C | 5.200941  | 4.013964  | 3.033273  | H  | 4.437716  | 6.747686  | -4.701101 |
| C | 3.901652  | 4.076290  | 3.597877  | H  | 6.361525  | 6.816718  | -3.306691 |
| C | 6.928224  | 3.655920  | -0.621903 | H  | -1.195959 | -7.233125 | -0.832637 |
| C | 6.810754  | 3.788680  | 0.784894  | H  | -1.433564 | -6.973316 | 1.521687  |
| C | 4.670762  | 3.413923  | -4.027025 | H  | 0.078047  | -7.415027 | -2.564455 |
| C | 5.780542  | 3.452939  | -3.145865 | H  | 2.237771  | -7.497797 | -3.560784 |
| C | -0.784906 | 4.908638  | -2.193554 | H  | 4.362599  | -7.442403 | -3.283184 |
| C | -0.512381 | 5.228222  | 1.897499  | H  | 6.287353  | -7.254751 | -1.904065 |
| C | -1.141303 | 5.138623  | 0.621453  | H  | 7.210956  | -7.029411 | -0.001360 |
| C | 3.221813  | 5.317609  | 3.636513  | H  | 6.999849  | -6.782129 | 2.357076  |
| C | 1.804981  | 5.320358  | 3.486705  | H  | 5.749769  | -6.612460 | 4.091553  |
| C | 6.620331  | 5.073524  | 1.351604  | H  | 3.573264  | -6.528531 | 5.053611  |
| C | 5.789632  | 5.189824  | 2.505157  | H  | 1.458359  | -6.579723 | 4.803564  |
| C | 6.283171  | 4.712042  | -2.724097 | H  | -0.471938 | -6.760132 | 3.427539  |
| C | 6.875449  | 4.814635  | -1.433202 | Pd | -3.550178 | 1.836507  | 0.866915  |
| C | 4.029829  | 4.626166  | -4.400823 | Pd | -4.698862 | 0.591989  | -1.438565 |
| C | -1.318910 | 6.255499  | -0.221554 | Pd | -3.361838 | -1.786205 | -1.846545 |
| C | -1.137831 | 6.142606  | -1.608269 | Pd | -3.768396 | -1.045271 | 0.676992  |
| C | 1.082590  | 6.501084  | 3.215481  | Pd | -5.474361 | 0.189125  | 2.407385  |
| C | -0.063554 | 6.455698  | 2.420872  | Pd | -6.562419 | -0.769006 | 0.127627  |
| C | 5.270937  | 6.426610  | 2.936845  | Pd | -5.290349 | -3.091039 | -0.321940 |
| C | 3.995612  | 6.489949  | 3.502614  | Pd | -6.281545 | 1.993675  | 0.342468  |
| C | 7.117924  | 6.058511  | -0.812439 | Pd | -6.091424 | -1.512822 | -2.358859 |
| C | 6.985599  | 6.188117  | 0.571585  | C  | -6.931154 | 3.848268  | 0.987907  |
| C | 4.781642  | 5.811037  | -4.289202 | C  | -7.370181 | 3.911344  | 2.455758  |
| C | 5.907515  | 5.851104  | -3.466507 | C  | -8.482587 | 2.925012  | 2.874120  |
| C | -1.201272 | -6.223690 | -0.449533 | C  | -8.020094 | 4.115544  | -0.059066 |
| C | -1.339447 | -6.070320 | 0.937781  | H  | -7.722176 | 4.942817  | 2.652421  |
| C | 0.531139  | -6.471306 | -2.828516 | H  | -6.042242 | 4.473161  | 0.820732  |
| C | 1.804467  | -6.519709 | -3.416774 | H  | -8.455219 | 5.119074  | 0.100719  |
| C | 4.717589  | -6.446207 | -3.067181 | H  | -7.618772 | 4.102956  | -1.081771 |
| C | 5.844941  | -6.334696 | -2.252933 | H  | -8.848831 | 3.397670  | 0.002205  |
| C | 7.086742  | -6.026851 | 0.377698  | H  | -9.406426 | 3.080908  | 2.301732  |
| C | 6.967634  | -5.882479 | 1.761432  | H  | -8.155066 | 1.888298  | 2.718213  |
| C | 5.265996  | -5.648448 | 4.134558  | H  | -8.725382 | 3.050696  | 3.937509  |
| C | 3.988014  | -5.598954 | 4.695536  | H  | -5.182716 | 1.806430  | 1.726128  |
| C | 1.081328  | -5.667864 | 4.367011  | H  | -6.490292 | 3.757193  | 3.093003  |
| C | -0.054031 | -5.774123 | 3.562737  |    |           |           |           |

**pre-trans/Pd<sub>9</sub>(H)/nanotube**

|     |           |           |           |   |           |           |           |
|-----|-----------|-----------|-----------|---|-----------|-----------|-----------|
| 179 |           |           |           | C | 1.137264  | -2.370653 | -1.346168 |
|     |           |           |           | C | 1.169410  | -3.671818 | -0.729593 |
| C   | -1.643417 | 5.915550  | 4.493860  | C | 0.448211  | -2.235555 | -2.597732 |
| C   | -2.406234 | 4.728004  | 4.506573  | C | -0.112851 | -3.456989 | -3.233187 |
| C   | -1.669134 | 3.465645  | 4.250515  | C | 0.346087  | -4.739216 | -2.837683 |
| C   | -0.442156 | 3.509896  | 3.577968  | C | 1.015713  | -4.879398 | -1.587870 |
| C   | 0.119913  | 4.829059  | 3.189526  | C | 0.026176  | -0.980778 | -3.038554 |
| C   | -0.402051 | 5.966226  | 3.840634  | C | -1.232928 | -0.882391 | -3.827579 |
| C   | -2.368953 | 2.181413  | 4.398714  | C | -1.937190 | -2.076919 | -4.119824 |
| C   | -1.679590 | 0.981059  | 4.167588  | C | -1.305825 | -3.339888 | -3.990299 |
| C   | -0.391737 | 1.018688  | 3.417214  | C | -3.342762 | -2.033728 | -4.233117 |
| C   | 0.118544  | 2.256079  | 3.012241  | C | -4.072075 | -3.243848 | -4.223463 |
| C   | -2.429608 | -0.286654 | 4.204021  | C | -3.415427 | -4.467257 | -4.499897 |
| C   | -1.710272 | -1.549072 | 3.954171  | C | -1.997164 | -4.517751 | -4.377059 |
| C   | -0.413988 | -1.497345 | 3.217590  | C | -4.014497 | -0.812568 | -4.006521 |
| C   | 0.105543  | -0.201040 | 2.819585  | C | -5.294850 | -0.839104 | -3.409439 |
| C   | -2.429465 | -2.752054 | 3.983890  | C | -5.859633 | -2.081700 | -3.051639 |
| C   | -1.758258 | -4.011603 | 3.636810  | C | -5.355892 | -3.267243 | -3.622229 |
| C   | -0.516932 | -3.979259 | 2.988785  | C | -6.637904 | -2.166860 | -1.878714 |
| C   | 0.087785  | -2.665233 | 2.641205  | C | -6.891313 | -3.434225 | -1.318778 |
| C   | 0.953641  | -2.609485 | 1.484527  | C | -6.742755 | -4.596951 | -2.115106 |
| C   | 1.076633  | -3.795819 | 0.653401  | C | -5.951547 | -4.511656 | -3.298460 |
| C   | 0.821801  | -5.144912 | 1.237666  | C | -6.828234 | -1.007579 | -1.097825 |
| C   | 0.020544  | -5.235731 | 2.405884  | C | -6.886754 | -1.127059 | 0.309054  |
| C   | 1.289113  | -1.318863 | 0.920107  | C | -6.767903 | -2.407672 | 0.891154  |
| C   | 1.403773  | -1.206728 | -0.550628 | C | -6.957646 | -3.557838 | 0.092169  |



Supplementary Material (ESI) for PCCP  
This journal is © the Owner Societies 2009

|   |           |           |           |    |           |           |           |
|---|-----------|-----------|-----------|----|-----------|-----------|-----------|
| C | -6.149347 | -2.537756 | 2.152348  | C  | -4.007498 | 6.470819  | -3.550489 |
| C | -5.723178 | -3.824834 | 2.569532  | C  | -7.003021 | 6.147242  | 0.862196  |
| C | -6.252836 | -4.983221 | 1.942397  | C  | -6.911494 | 6.254849  | -0.526995 |
| C | -6.893032 | -4.844914 | 0.677790  | C  | -4.566551 | 5.916089  | 4.271038  |
| C | -5.704221 | -1.372582 | 2.826516  | C  | -5.715666 | 5.960693  | 3.481440  |
| C | -4.555947 | -1.490894 | 3.760546  | C  | 1.121426  | -6.259631 | 0.427732  |
| C | -3.902858 | -2.724518 | 3.871547  | C  | 1.221740  | -6.128269 | -0.965120 |
| C | -4.587814 | -3.952906 | 3.408921  | C  | -0.539204 | -6.447256 | 2.863037  |
| C | -2.529311 | -5.279031 | 3.678778  | C  | -1.793604 | -6.468656 | 3.492127  |
| C | -3.949911 | -5.216267 | 3.540198  | C  | -4.714647 | -6.357230 | 3.231749  |
| C | 0.953356  | -0.112997 | 1.669126  | C  | -5.864076 | -6.240833 | 2.449674  |
| C | 0.521357  | 0.204344  | -2.395432 | C  | -7.178589 | -5.953149 | -0.147769 |
| C | 1.222312  | 0.091976  | -1.157215 | C  | -7.099704 | -5.830612 | -1.536481 |
| C | -3.293505 | 0.403091  | -4.030428 | C  | -5.468223 | -5.655852 | -3.963395 |
| C | -1.883774 | 0.371907  | -3.933561 | C  | -4.207651 | -5.633010 | -4.564056 |
| C | -6.590372 | 0.259099  | -1.668942 | C  | -1.293312 | -5.739095 | -4.326066 |
| C | -5.811302 | 0.345203  | -2.844757 | C  | -0.135317 | -5.850564 | -3.555564 |
| C | -6.110879 | -0.086063 | 2.377120  | H  | -2.058660 | 6.855861  | 4.823416  |
| C | -6.717867 | 0.028978  | 1.104818  | H  | 0.046987  | 6.940394  | 3.719249  |
| C | -3.828300 | -0.261734 | 4.117708  | H  | 1.522069  | 7.201457  | -0.407135 |
| C | 1.427378  | 1.281355  | -0.348410 | H  | 1.284430  | 7.047926  | 1.957473  |
| C | 1.219150  | 1.176251  | 1.091653  | H  | -1.461941 | 7.422542  | -3.608958 |
| C | -1.191560 | 1.570741  | -3.630041 | H  | 0.527256  | 7.334235  | -2.307761 |
| C | 0.072583  | 1.500379  | -2.846018 | H  | -5.728554 | 7.380895  | -2.711388 |
| C | -5.253734 | 1.589452  | -3.204688 | H  | -3.586691 | 7.444844  | -3.746490 |
| C | -3.973903 | 1.620784  | -3.802546 | H  | -7.104121 | 7.066068  | 1.418721  |
| C | -6.851775 | 1.305529  | 0.512349  | H  | -6.941802 | 7.247876  | -0.949079 |
| C | -6.789944 | 1.419964  | -0.894778 | H  | -4.197056 | 6.853573  | 4.658159  |
| C | -4.525315 | 1.027589  | 3.974342  | H  | -6.160221 | 6.930494  | 3.320464  |
| C | -5.673542 | 1.096327  | 3.035049  | H  | 1.112431  | -7.263272 | 0.825609  |
| C | 0.930341  | 2.358199  | 1.832658  | H  | 1.285316  | -7.040870 | -1.538038 |
| C | 0.554503  | 2.653582  | -2.237918 | H  | -0.108302 | -7.401174 | 2.598653  |
| C | 1.264273  | 2.568529  | -0.978435 | H  | -2.236053 | -7.438109 | 3.664007  |
| C | -3.262084 | 2.840245  | -3.827890 | H  | -4.367998 | -7.355304 | 3.452581  |
| C | -1.855209 | 2.818962  | -3.722526 | H  | -6.330297 | -7.159181 | 2.128378  |
| C | -6.558855 | 2.686371  | -1.471905 | H  | -7.305080 | -6.948215 | 0.249768  |
| C | -5.777687 | 2.772770  | -2.642801 | H  | -7.162929 | -6.738252 | -2.117350 |
| C | -6.087125 | 2.368766  | 2.565518  | H  | -5.963694 | -6.612101 | -3.890839 |
| C | -6.701077 | 2.467659  | 1.299253  | H  | -3.817169 | -6.573711 | -4.920341 |
| C | -3.842818 | 2.208812  | 4.290144  | H  | -1.696246 | -6.651324 | -4.737933 |
| C | 1.300652  | 3.754186  | -0.153259 | H  | 0.272867  | -6.840467 | -3.419023 |
| C | 1.135864  | 3.655830  | 1.224359  | Pd | 3.551328  | 1.752392  | -1.015907 |
| C | -1.178851 | 4.023594  | -3.403277 | Pd | 4.630085  | 0.536762  | 1.350119  |
| C | 0.028741  | 3.979320  | -2.660619 | Pd | 3.344029  | -1.880129 | 1.722073  |
| C | -5.233099 | 4.019717  | -3.008520 | Pd | 3.792353  | -1.106895 | -0.797412 |
| C | -3.950680 | 4.054935  | -3.612636 | Pd | 5.553596  | 0.164670  | -2.459319 |
| C | -6.852891 | 3.739647  | 0.701921  | Pd | 6.576876  | -0.776339 | -0.152664 |
| C | -6.776829 | 3.850338  | -0.709612 | Pd | 5.333291  | -3.113906 | 0.225922  |
| C | -4.497607 | 3.513925  | 4.041859  | Pd | 6.246219  | 1.976137  | -0.352440 |
| C | -5.632303 | 3.556453  | 3.193140  | Pd | 6.044107  | -1.543315 | 2.313321  |
| C | 0.916811  | 4.902008  | 2.016354  | C  | 6.965291  | 3.793212  | -1.033835 |
| C | 0.531361  | 5.166603  | -2.068042 | C  | 8.398208  | 3.746144  | -0.485189 |
| C | 1.197587  | 5.085641  | -0.810578 | C  | 9.395648  | 2.964692  | -1.366421 |
| C | -3.254776 | 5.285521  | -3.690306 | C  | 6.070113  | 4.884964  | -0.443160 |
| C | -1.834010 | 5.269825  | -3.584365 | H  | 8.392865  | 3.323985  | 0.539506  |
| C | -6.585791 | 5.123941  | -1.300951 | H  | 6.932134  | 3.776073  | -2.128701 |
| C | -5.788834 | 5.211519  | -2.480519 | H  | 6.462126  | 5.880823  | -0.718660 |
| C | -6.129500 | 4.816559  | 2.767734  | H  | 5.043626  | 4.812296  | -0.818395 |
| C | -6.759114 | 4.909083  | 1.493841  | H  | 6.037926  | 4.841892  | 0.654732  |
| C | -3.828741 | 4.722019  | 4.378214  | H  | 9.072397  | 1.924856  | -1.502731 |
| C | 1.417021  | 6.211454  | 0.010446  | H  | 9.477023  | 3.423338  | -2.361112 |
| C | 1.272668  | 6.121575  | 1.403264  | H  | 10.396188 | 2.953524  | -0.915451 |
| C | -1.086933 | 6.443721  | -3.353027 | H  | 5.233318  | 1.785682  | -1.806997 |
| C | 0.083195  | 6.392977  | -2.594388 | H  | 8.753649  | 4.784850  | -0.353189 |
| C | -5.265929 | 6.434262  | -2.945841 |    |           |           |           |

**but-1-ene/Pd<sub>9</sub>(H<sub>2</sub>)/nanotube**

|     |           |          |           |   |           |           |           |
|-----|-----------|----------|-----------|---|-----------|-----------|-----------|
| 179 |           |          |           | C | -2.134204 | 2.562065  | -0.124714 |
|     |           |          |           | C | -1.700037 | 1.364662  | -0.831605 |
| C   | -1.737981 | 5.165660 | -2.881342 | C | -1.109072 | 1.507814  | -2.137534 |
| C   | -1.792124 | 3.931578 | -2.204589 | C | -1.891747 | 2.663742  | 1.291502  |
| C   | -1.006500 | 2.869930 | -2.722110 | C | -1.218424 | 1.567710  | 1.970217  |
| C   | 0.091130  | 3.159075 | -3.573800 | C | -1.139594 | 0.287252  | 1.339373  |
| C   | 0.354883  | 4.507753 | -3.928829 | C | -1.396287 | 0.187034  | -0.075992 |
| C   | -0.677616 | 5.449183 | -3.741999 | C | -0.475431 | -0.801272 | 2.006811  |
| C   | -2.361703 | 3.810942 | -0.903072 | C | 0.380443  | -0.521838 | 3.122977  |

Supplementary Material (ESI) for PCCP  
This journal is © the Owner Societies 2009

|   |           |           |           |    |            |           |           |
|---|-----------|-----------|-----------|----|------------|-----------|-----------|
| C | 0.524853  | 0.848270  | 3.558821  | C  | 3.153917   | 6.779991  | 3.565616  |
| C | -0.344188 | 1.835160  | 3.075729  | C  | 4.200832   | 7.050218  | 2.684178  |
| C | 1.263873  | -1.562998 | 3.604859  | C  | 6.256566   | -0.019164 | 2.760347  |
| C | 2.550191  | -1.167213 | 4.248048  | C  | 0.336925   | -3.173697 | -2.076083 |
| C | 2.889124  | 0.266930  | 4.307758  | C  | -0.199749  | -3.342798 | -0.752993 |
| C | 1.804697  | 1.261186  | 4.203482  | C  | 3.830442   | -2.122064 | -4.010099 |
| C | 1.105153  | -2.877046 | 3.157324  | C  | 2.500549   | -2.538744 | -3.789683 |
| C | 2.066122  | -3.924734 | 3.587856  | C  | 7.133222   | -1.068839 | -1.908431 |
| C | 3.287675  | -3.538648 | 4.153481  | C  | 6.308577   | -1.337887 | -3.020346 |
| C | 3.585930  | -2.110167 | 4.331181  | C  | 6.980176   | -1.085342 | 2.168607  |
| C | 1.885858  | -5.334652 | 3.156459  | C  | 7.466754   | -0.938837 | 0.852495  |
| C | 2.785598  | -6.285997 | 3.681430  | C  | 0.164146   | -4.519748 | -0.016584 |
| C | 4.017023  | -5.888584 | 4.225414  | C  | 2.258769   | -3.904003 | -3.490624 |
| C | 4.389593  | -4.527545 | 4.253019  | C  | 1.185633   | -4.258239 | -2.634363 |
| C | 4.980778  | -1.685117 | 4.088138  | C  | 6.134961   | -2.673774 | -3.432488 |
| C | 5.963912  | -2.719245 | 3.690568  | C  | 4.871759   | -3.074536 | -3.936615 |
| C | 5.723828  | -4.085979 | 3.997972  | C  | 7.933979   | -2.076881 | 0.156751  |
| C | 0.254431  | -3.171243 | 2.033691  | C  | 7.762244   | -2.142807 | -1.249248 |
| C | 0.388725  | -4.441787 | 1.357429  | C  | 6.965796   | -2.380467 | 2.746362  |
| C | 1.039189  | -5.596002 | 2.046300  | C  | 1.131515   | -5.561212 | -2.076368 |
| C | 5.243808  | -0.340631 | 3.798083  | C  | 0.599964   | -5.731704 | -0.764642 |
| C | 4.214657  | 0.670379  | 4.094290  | C  | 4.576201   | -4.455057 | -4.043558 |
| C | -0.414162 | -2.094872 | 1.379718  | C  | 3.236938   | -4.881210 | -3.811502 |
| C | 4.502418  | 2.075920  | 3.761393  | C  | 7.910126   | -3.385689 | -1.913657 |
| C | 3.527386  | 3.048519  | 4.014228  | C  | 7.072095   | -3.659599 | -3.034679 |
| C | 2.131426  | 2.624189  | 4.250828  | C  | 7.770355   | -3.411163 | 2.192663  |
| C | 1.085094  | 3.633263  | 4.034137  | C  | 8.271323   | -3.252595 | 0.868991  |
| C | -0.139404 | 3.252399  | 3.469722  | C  | 0.795421   | -6.904983 | -0.006650 |
| C | 3.766017  | 4.444930  | 3.582693  | C  | 1.015640   | -6.837264 | 1.377162  |
| C | 2.797209  | 5.448862  | 3.852782  | C  | 2.910815   | -6.235233 | -3.586807 |
| C | 1.442331  | 5.071926  | 4.102126  | C  | 1.871261   | -6.572158 | -2.718812 |
| C | 0.371605  | 5.988406  | 4.044547  | C  | 6.902574   | -4.961222 | -3.546559 |
| C | -0.867212 | 5.612843  | 3.503372  | C  | 5.661966   | -5.356053 | -4.051885 |
| C | -1.077997 | 4.307578  | 3.009896  | C  | 8.814595   | -4.328201 | 0.134496  |
| C | -1.935060 | 4.020922  | 1.914022  | C  | 8.630814   | -4.396454 | -1.248050 |
| C | -2.839046 | 4.921687  | -0.176900 | C  | 6.767375   | -4.995224 | 3.741321  |
| C | -2.626563 | 5.025623  | 1.205687  | C  | 7.789895   | -4.656454 | 2.854946  |
| C | -0.685896 | -2.199764 | -0.039605 | Pd | -4.123946  | 2.210706  | 0.847028  |
| C | -0.968454 | -0.992742 | -0.786308 | Pd | -6.661452  | 1.403787  | 1.571556  |
| C | -0.415078 | -0.842531 | -2.106215 | Pd | -6.242269  | 2.165074  | -0.983234 |
| C | -0.368079 | 0.465988  | -2.696747 | Pd | -6.741978  | -0.372914 | -0.367967 |
| C | 0.780398  | 0.794158  | -3.585539 | Pd | -5.796248  | -3.044506 | 0.145926  |
| C | 1.059609  | 2.158744  | -3.842762 | C  | -7.713179  | -3.914139 | 1.130248  |
| C | 0.360973  | -1.911623 | -2.669914 | C  | -8.888970  | -2.959110 | 1.006952  |
| C | 1.501233  | -1.559726 | -3.561021 | Pd | -4.147411  | 0.428583  | -1.122814 |
| C | 1.766326  | -0.194069 | -3.832984 | Pd | -5.424603  | -1.561635 | -2.370232 |
| C | 3.103954  | 0.213573  | -4.039900 | Pd | -3.102768  | -2.211433 | -0.637025 |
| C | 3.422807  | 1.589610  | -3.983136 | Pd | -4.704972  | -0.611096 | 1.368998  |
| C | 2.395091  | 2.554337  | -4.067540 | C  | -6.713063  | -3.816637 | 2.090757  |
| C | 2.722375  | 3.928066  | -4.027029 | H  | -6.695747  | -2.990637 | 2.799614  |
| C | 1.703635  | 4.901418  | -4.163080 | H  | 4.725024   | -6.671499 | 4.451254  |
| C | 4.686232  | 1.981185  | -3.486204 | H  | 2.636287   | -7.344696 | 3.532113  |
| C | 4.881430  | 3.319917  | -3.085293 | H  | 0.955960   | -7.861676 | -0.480262 |
| C | 3.990883  | 4.317720  | -3.527989 | H  | 1.326883   | -7.747049 | 1.868087  |
| C | 4.212194  | 5.669370  | -3.164374 | H  | 3.535634   | -7.041868 | -3.937790 |
| C | 3.343393  | 6.638143  | -3.704544 | H  | 1.768560   | -7.613183 | -2.452381 |
| C | 2.096536  | 6.255937  | -4.204176 | H  | 7.650620   | -5.728757 | -3.418318 |
| C | 4.139259  | -0.745166 | -3.953421 | H  | 5.537927   | -6.402313 | -4.284999 |
| C | 5.400543  | -0.348977 | -3.454363 | H  | 9.239164   | -5.195854 | 0.615154  |
| C | 5.587594  | 0.988753  | -3.049641 | H  | 8.918699   | -5.312938 | -1.740335 |
| C | 6.412961  | 1.257267  | -1.934465 | H  | 6.735342   | -6.016124 | 4.090565  |
| C | 6.313292  | 2.509807  | -1.295696 | H  | 8.483325   | -5.438665 | 2.587989  |
| C | 5.708137  | 3.587979  | -1.974750 | H  | -2.855108  | 5.977737  | 1.659833  |
| C | 5.623694  | 4.846992  | -1.349087 | H  | -3.210122  | 5.803860  | -0.675799 |
| C | 5.054489  | 5.941594  | -2.046257 | H  | -1.586248  | 6.400864  | 3.338676  |
| C | 6.471970  | 2.581008  | 0.106687  | H  | 0.516594   | 7.038628  | 4.247653  |
| C | 6.036074  | 3.739247  | 0.785550  | H  | 2.550383   | 7.615794  | 3.885627  |
| C | 5.792285  | 4.925359  | 0.056595  | H  | 4.338893   | 8.079448  | 2.391602  |
| C | 5.407528  | 6.106543  | 0.735031  | H  | 5.124929   | 8.251337  | 0.422945  |
| C | 5.262147  | 7.282438  | -0.031543 | H  | 4.811236   | 8.107059  | -1.932207 |
| C | 5.081875  | 7.199799  | -1.413700 | H  | 3.531217   | 7.696167  | -3.602460 |
| C | 7.025703  | 0.180475  | -1.262389 | H  | 1.407497   | 7.046211  | -4.459171 |
| C | 7.185633  | 0.246818  | 0.140082  | H  | -0.611490  | 6.456903  | -4.121943 |
| C | 6.735654  | 1.395502  | 0.830047  | H  | -2.416937  | 5.973354  | -2.654261 |
| C | 6.253228  | 1.266828  | 2.153409  | H  | -7.811068  | -4.853859 | 0.578081  |
| C | 5.531174  | 2.349739  | 2.725898  | H  | -6.054009  | -4.655808 | 2.307483  |
| C | 5.539222  | 3.622493  | 2.100741  | C  | -10.188571 | -3.580767 | 1.582188  |
| C | 4.796034  | 4.701743  | 2.643187  | H  | -8.662221  | -2.020583 | 1.530156  |
| C | 4.890447  | 5.991512  | 2.056902  | H  | -9.055806  | -2.705724 | -0.049910 |

|   |            |           |           |   |            |           |          |
|---|------------|-----------|-----------|---|------------|-----------|----------|
| H | -4.685429  | -2.745756 | -1.265879 | H | -10.073033 | -3.810385 | 2.649109 |
| H | -11.031131 | -2.886280 | 1.468434  | H | -4.138373  | -2.114279 | 0.831820 |
| H | -10.445914 | -4.512725 | 1.060539  |   |            |           |          |

***n*-butane/Pd<sub>9</sub>/nanotube**

|     |  |  |  |   |           |           |           |
|-----|--|--|--|---|-----------|-----------|-----------|
| 179 |  |  |  | C | -3.659003 | -0.024773 | 4.168279  |
|     |  |  |  | C | 1.541970  | 1.092681  | -0.514864 |
|     |  |  |  | C | 1.364452  | 1.046218  | 0.941919  |
|     |  |  |  | C | -1.212697 | 1.427286  | -3.704242 |
|     |  |  |  | C | 0.071859  | 1.311310  | -2.959004 |
|     |  |  |  | C | -5.250749 | 1.682838  | -3.149991 |
|     |  |  |  | C | -3.992522 | 1.625604  | -3.790197 |
|     |  |  |  | C | -6.727210 | 1.597046  | 0.626065  |
|     |  |  |  | C | -6.710564 | 1.666509  | -0.785256 |
|     |  |  |  | C | -4.292256 | 1.295253  | 4.010102  |
|     |  |  |  | C | -5.469473 | 1.398333  | 3.110808  |
|     |  |  |  | C | 1.152201  | 2.265666  | 1.647148  |
|     |  |  |  | C | 0.639570  | 2.454993  | -2.409578 |
|     |  |  |  | C | 1.407748  | 2.372656  | -1.184351 |
|     |  |  |  | C | -3.216996 | 2.802371  | -3.877359 |
|     |  |  |  | C | -1.810606 | 2.706517  | -3.816550 |
|     |  |  |  | C | -6.432132 | 2.900721  | -1.409384 |
|     |  |  |  | C | -5.689585 | 2.909326  | -2.608211 |
|     |  |  |  | C | -5.832451 | 2.676968  | 2.616953  |
|     |  |  |  | C | -6.486111 | 2.771908  | 1.370419  |
|     |  |  |  | C | -3.537537 | 2.446699  | 4.264967  |
|     |  |  |  | C | 1.523366  | 3.580467  | -0.394789 |
|     |  |  |  | C | 1.400009  | 3.533135  | 0.988614  |
|     |  |  |  | C | -1.059468 | 3.881067  | -3.560841 |
|     |  |  |  | C | 0.169731  | 3.793746  | -2.858828 |
|     |  |  |  | C | -5.091263 | 4.112864  | -3.030993 |
|     |  |  |  | C | -3.830995 | 4.059075  | -3.678744 |
|     |  |  |  | C | -6.590987 | 4.032211  | 0.739092  |
|     |  |  |  | C | -6.559306 | 4.096935  | -0.676980 |
|     |  |  |  | C | -4.131619 | 3.777231  | 4.000283  |
|     |  |  |  | C | -5.292923 | 3.856134  | 3.191148  |
|     |  |  |  | C | 1.272409  | 4.812645  | 1.747054  |
|     |  |  |  | C | 0.757537  | 4.970488  | -2.326704 |
|     |  |  |  | C | 1.463304  | 4.894604  | -1.091051 |
|     |  |  |  | C | -3.072756 | 5.246351  | -3.819672 |
|     |  |  |  | C | -1.652080 | 5.155220  | -3.762503 |
|     |  |  |  | C | -6.320431 | 5.340070  | -1.314077 |
|     |  |  |  | C | -5.562176 | 5.348640  | -2.522081 |
|     |  |  |  | C | -5.737921 | 5.128295  | 2.744501  |
|     |  |  |  | C | -6.406421 | 5.217585  | 1.490364  |
|     |  |  |  | C | -3.388313 | 4.956809  | 4.275680  |
|     |  |  |  | C | 1.766057  | 6.032942  | -0.315227 |
|     |  |  |  | C | 1.666952  | 5.993196  | 1.083578  |
|     |  |  |  | C | -0.834208 | 6.292601  | -3.599035 |
|     |  |  |  | C | 0.358363  | 6.201757  | -2.880444 |
|     |  |  |  | C | -4.990338 | 6.526283  | -3.042993 |
|     |  |  |  | C | -3.754494 | 6.475116  | -3.691671 |
|     |  |  |  | C | -6.605143 | 6.448166  | 0.828745  |
|     |  |  |  | C | -6.556754 | 6.509561  | -0.565422 |
|     |  |  |  | C | -4.066047 | 6.185078  | 4.158523  |
|     |  |  |  | C | -5.239149 | 6.268587  | 3.408288  |
|     |  |  |  | C | 0.830211  | -6.393344 | 0.522890  |
|     |  |  |  | C | 0.874847  | -6.308824 | -0.876461 |
|     |  |  |  | C | -0.743117 | -6.415363 | 3.020049  |
|     |  |  |  | C | -1.977870 | -6.348524 | 3.683760  |
|     |  |  |  | C | -4.896467 | -6.086872 | 3.505404  |
|     |  |  |  | C | -6.065988 | -5.931873 | 2.760524  |
|     |  |  |  | C | -7.464541 | -5.649307 | 0.206326  |
|     |  |  |  | C | -7.432861 | -5.571902 | -1.187531 |
|     |  |  |  | C | -5.884001 | -5.558600 | -3.673643 |
|     |  |  |  | C | -4.645516 | -5.623185 | -4.315721 |
|     |  |  |  | C | -1.735486 | -5.883331 | -4.164237 |
|     |  |  |  | C | -0.561135 | -6.035191 | -3.426044 |
|     |  |  |  | H | -1.493989 | 7.004739  | 4.590782  |
|     |  |  |  | H | 0.572042  | 6.943932  | 3.413453  |
|     |  |  |  | H | 1.905657  | 7.003034  | -0.767804 |
|     |  |  |  | H | 1.746164  | 6.934057  | 1.606900  |
|     |  |  |  | H | -1.164141 | 7.281571  | -3.877068 |
|     |  |  |  | H | 0.864331  | 7.125598  | -2.643807 |
|     |  |  |  | H | -5.391743 | 7.503644  | -2.822310 |
|     |  |  |  | H | -3.288620 | 7.418113  | -3.932350 |

|    |           |           |           |    |          |           |           |
|----|-----------|-----------|-----------|----|----------|-----------|-----------|
| H  | -6.636422 | 7.387182  | 1.359265  | Pd | 5.582753 | 0.035594  | -2.477692 |
| H  | -6.547937 | 7.489889  | -1.017167 | Pd | 6.649608 | -0.969602 | -0.280543 |
| H  | -3.634248 | 7.112018  | 4.504370  | Pd | 5.301608 | -3.235335 | 0.006328  |
| H  | -5.638027 | 7.255732  | 3.233519  | Pd | 6.251332 | 1.654274  | -0.327805 |
| H  | 0.784554  | -7.382737 | 0.952799  | Pd | 5.927807 | -1.629404 | 2.181844  |
| H  | 0.865415  | -7.240233 | -1.421904 | C  | 6.483183 | 4.910110  | -0.432890 |
| H  | -0.371905 | -7.399184 | -2.775078 | C  | 8.011964 | 4.885566  | -0.201532 |
| H  | -2.466075 | -7.286505 | 3.900542  | C  | 8.466106 | 3.855414  | 0.853676  |
| H  | -4.595352 | -7.095320 | 3.744940  | C  | 5.659701 | 5.399012  | 0.776310  |
| H  | -6.591157 | -6.832902 | 2.484325  | H  | 8.345550 | 5.890691  | 0.100771  |
| H  | -7.628975 | -6.623801 | 0.639370  | H  | 6.257425 | 5.540546  | -1.306097 |
| H  | -7.567024 | -6.491240 | -1.737135 | H  | 5.939086 | 6.426932  | 1.047657  |
| H  | -6.427752 | -6.483467 | -3.554588 | H  | 4.587276 | 5.386142  | 0.546930  |
| H  | -4.318983 | -6.594123 | -4.654810 | H  | 5.814617 | 4.761633  | 1.655559  |
| H  | -2.200811 | -6.784134 | -4.533374 | H  | 8.072414 | 4.087638  | 1.851002  |
| H  | -0.203636 | -7.041622 | -3.270092 | H  | 8.112101 | 2.840458  | 0.583835  |
| Pd | 3.607702  | 1.492025  | -1.175960 | H  | 9.560868 | 3.809835  | 0.923096  |
| Pd | 4.473348  | 0.334928  | 1.174862  | H  | 6.143488 | 3.886642  | -0.711742 |
| Pd | 3.273819  | -2.134587 | 1.575504  | H  | 8.512222 | 4.663267  | -1.155990 |
| Pd | 3.783015  | -1.301402 | -1.033958 |    |          |           |           |

**TS cis-but-2-ene/Pd<sub>9</sub>(H<sub>2</sub>)/nanotube → pre-cis/Pd<sub>9</sub>(H)/nanotube**

|     |  |  |  |   |           |           |           |
|-----|--|--|--|---|-----------|-----------|-----------|
| 179 |  |  |  | C | -6.340055 | -4.793536 | 2.139243  |
|     |  |  |  | C | -7.010305 | -4.655223 | 0.890267  |
|     |  |  |  | C | -5.644598 | -1.189141 | 2.941796  |
|     |  |  |  | C | -4.476701 | -1.330792 | 3.847814  |
|     |  |  |  | C | -3.864031 | -2.584228 | 3.965764  |
|     |  |  |  | C | -4.602371 | -3.796004 | 3.543089  |
|     |  |  |  | C | -2.584929 | -5.188283 | 3.789530  |
|     |  |  |  | C | -4.005411 | -5.078330 | 3.682568  |
|     |  |  |  | C | 1.024796  | -0.182707 | 1.603003  |
|     |  |  |  | C | 0.478714  | 0.077366  | -2.453635 |
|     |  |  |  | C | 1.209066  | -0.038491 | -1.233126 |
|     |  |  |  | C | -3.364819 | 0.381266  | -4.003417 |
|     |  |  |  | C | -1.955207 | 0.302272  | -3.938552 |
|     |  |  |  | C | -6.600684 | 0.393739  | -1.557218 |
|     |  |  |  | C | -5.851750 | 0.432238  | -2.754938 |
|     |  |  |  | C | -6.019260 | 0.102620  | 2.479902  |
|     |  |  |  | C | -6.657279 | 0.216426  | 1.222753  |
|     |  |  |  | C | -3.698454 | -0.121688 | 4.164182  |
|     |  |  |  | C | 1.483229  | 1.157569  | -0.454911 |
|     |  |  |  | C | 1.318554  | 1.085472  | 0.993987  |
|     |  |  |  | C | -1.214840 | 1.481071  | -3.672793 |
|     |  |  |  | C | 0.064233  | 1.379934  | -2.917112 |
|     |  |  |  | C | -5.261296 | 1.649850  | -3.151871 |
|     |  |  |  | C | -3.996745 | 1.625918  | -3.781640 |
|     |  |  |  | C | -6.764297 | 1.486362  | 0.610908  |
|     |  |  |  | C | -6.738589 | 1.574124  | -0.799266 |
|     |  |  |  | C | -4.354140 | 1.188309  | 4.014279  |
|     |  |  |  | C | -5.523955 | 1.280416  | 3.104074  |
|     |  |  |  | C | 1.089111  | 2.290087  | 1.719901  |
|     |  |  |  | C | 0.602491  | 2.526234  | -2.344676 |
|     |  |  |  | C | 1.346562  | 2.438316  | -1.104985 |
|     |  |  |  | C | -3.243762 | 2.819008  | -3.846066 |
|     |  |  |  | C | -1.836441 | 2.750066  | -3.772979 |
|     |  |  |  | C | -6.480468 | 2.821529  | -1.405628 |
|     |  |  |  | C | -5.729044 | 2.860337  | -2.598326 |
|     |  |  |  | C | -5.906534 | 2.558034  | 2.622570  |
|     |  |  |  | C | -6.551847 | 2.656088  | 1.371911  |
|     |  |  |  | C | -3.623897 | 2.350404  | 4.291426  |
|     |  |  |  | C | 1.447320  | 3.636932  | -0.302717 |
|     |  |  |  | C | 1.319937  | 3.568708  | 1.080640  |
|     |  |  |  | C | -1.110926 | 3.935574  | -3.492096 |
|     |  |  |  | C | 0.112644  | 3.861956  | -2.778470 |
|     |  |  |  | C | -5.151359 | 4.080947  | -3.000509 |
|     |  |  |  | C | -3.884162 | 4.060692  | -3.636526 |
|     |  |  |  | C | -6.676946 | 3.921994  | 0.755781  |
|     |  |  |  | C | -6.637033 | 4.005428  | -0.659106 |
|     |  |  |  | C | -4.239772 | 3.672907  | 4.035750  |
|     |  |  |  | C | -5.394488 | 3.739982  | 3.216029  |
|     |  |  |  | C | 1.165168  | 4.835743  | 1.854601  |
|     |  |  |  | C | 0.672317  | 5.041124  | -2.221815 |
|     |  |  |  | C | 1.370684  | 4.959251  | -0.981820 |
|     |  |  |  | C | -3.147978 | 5.264526  | -3.753107 |
|     |  |  |  | C | -1.726456 | 5.200709  | -3.680592 |
|     |  |  |  | C | -6.418822 | 5.261144  | -1.278642 |

Supplementary Material (ESI) for PCCP  
 This journal is © the Owner Societies 2009

|   |           |           |           |    |           |           |           |
|---|-----------|-----------|-----------|----|-----------|-----------|-----------|
| C | -5.651436 | 5.300416  | -2.480178 | H  | -5.803308 | 7.131993  | 3.295430  |
| C | -5.859819 | 5.008958  | 2.781037  | H  | 0.909539  | -7.348953 | 0.884574  |
| C | -6.521072 | 5.101077  | 1.523225  | H  | 1.019608  | -7.173165 | -1.486764 |
| C | -3.521690 | 4.862746  | 4.333391  | H  | -0.265484 | -7.413090 | 2.693346  |
| C | 1.652592  | 6.091093  | -0.188616 | H  | -2.366927 | -7.356283 | 3.809142  |
| C | 1.545253  | 6.031074  | 1.209161  | H  | -4.498699 | -7.202791 | 3.644282  |
| C | -0.933409 | 6.351463  | -3.489339 | H  | -6.486429 | -6.961979 | 2.366721  |
| C | 0.253313  | 6.272977  | -2.759372 | H  | -7.506001 | -6.750144 | 0.512435  |
| C | -5.098692 | 6.495840  | -2.980716 | H  | -7.424210 | -6.586317 | -1.861190 |
| C | -3.855396 | 6.477760  | -3.616724 | H  | -6.270783 | -6.532800 | -3.668795 |
| C | -6.740218 | 6.335778  | 0.875877  | H  | -4.150859 | -6.587498 | -4.751776 |
| C | -6.684016 | 6.415952  | -0.517039 | H  | -2.030062 | -6.736346 | -4.616679 |
| C | -4.220738 | 6.079632  | 4.222939  | H  | -0.036768 | -6.970684 | -3.342410 |
| C | -5.388044 | 6.150309  | 3.462479  | Pd | 3.572085  | 1.620688  | -1.256058 |
| C | 0.941098  | -6.353197 | 0.468355  | Pd | 4.546983  | 0.450704  | 1.166949  |
| C | 1.003865  | -6.249142 | -0.928992 | Pd | 3.326507  | -2.005223 | 1.608168  |
| C | -0.656568 | -6.440089 | 2.950223  | Pd | 3.786291  | -1.237676 | -0.950282 |
| C | -1.895447 | -6.406181 | 3.608747  | Pd | 5.601220  | 0.081928  | -2.541540 |
| C | -4.816359 | -6.197269 | 3.413914  | Pd | 6.555284  | -0.839775 | -0.225093 |
| C | -5.980954 | -6.054810 | 2.659084  | Pd | 5.355476  | -3.192285 | 0.133596  |
| C | -7.356932 | -5.767097 | 0.093424  | Pd | 6.261462  | 1.899386  | -0.328208 |
| C | -7.313648 | -5.671483 | -1.298960 | Pd | 5.992008  | -1.565798 | 2.235155  |
| C | -5.744610 | -5.595875 | -3.771353 | C  | 7.221562  | 3.791157  | -0.939221 |
| C | -4.499654 | -5.627645 | -4.403354 | C  | 7.826695  | 3.541000  | 0.332600  |
| C | -1.585901 | -5.831550 | -4.231607 | C  | 6.202312  | 4.888446  | -1.193081 |
| C | -0.413806 | -5.969693 | -3.487090 | C  | 7.542749  | 4.379173  | 1.573946  |
| H | -1.669227 | 6.941472  | 4.696063  | H  | 8.811429  | 3.072991  | 0.306174  |
| H | 0.410122  | 6.933260  | 3.540128  | H  | 7.779834  | 3.458691  | -1.815844 |
| H | 1.779643  | 7.069255  | -0.627403 | H  | 5.495861  | 5.008609  | -0.364545 |
| H | 1.604337  | 6.966190  | 1.745425  | H  | 5.624675  | 4.672074  | -2.097167 |
| H | -1.280424 | 7.338156  | -3.754315 | H  | 6.713528  | 5.854453  | -1.341742 |
| H | 0.737354  | 7.202987  | -2.502070 | H  | 7.868646  | 3.863442  | 2.483061  |
| H | -5.522082 | 7.462019  | -2.751937 | H  | 6.479498  | 4.614241  | 1.679553  |
| H | -3.406030 | 7.432850  | -3.840530 | H  | 8.095000  | 5.328485  | 1.505087  |
| H | -6.794295 | 7.267120  | 1.417947  | H  | 5.252207  | 1.738465  | -1.941576 |
| H | -6.692064 | 7.401912  | -0.956382 | H  | 7.198879  | 2.042793  | 0.958227  |
| H | -3.809597 | 7.010354  | 4.583433  |    |           |           |           |

|                |           |      |      |      |      |     |   |      |      |      |
|----------------|-----------|------|------|------|------|-----|---|------|------|------|
| 1              | 33        | 6    | 0.00 | 0.00 | 0.00 | 72  | 6 | 0.00 | 0.00 | 0.00 |
| A              | 34        | 6    | 0.00 | 0.00 | 0.00 | 73  | 6 | 0.00 | 0.00 | 0.00 |
| Frequencies -- | -672.0079 |      |      |      |      | 74  | 6 | 0.00 | 0.00 | 0.00 |
| Red. masses -- | 1.1948    |      |      |      |      | 75  | 6 | 0.00 | 0.00 | 0.00 |
| Frc consts --  | 0.3179    |      |      |      |      | 76  | 6 | 0.00 | 0.00 | 0.00 |
| IR Inten --    | 0.0000    |      |      |      |      | 77  | 6 | 0.00 | 0.00 | 0.00 |
| Atom AN        | X         | Y    | Z    |      |      | 78  | 6 | 0.00 | 0.00 | 0.00 |
| 1              | 6         | 0.00 | 0.00 | 0.00 |      | 79  | 6 | 0.00 | 0.00 | 0.00 |
| 2              | 6         | 0.00 | 0.00 | 0.00 |      | 80  | 6 | 0.00 | 0.00 | 0.00 |
| 3              | 6         | 0.00 | 0.00 | 0.00 |      | 81  | 6 | 0.00 | 0.00 | 0.00 |
| 4              | 6         | 0.00 | 0.00 | 0.00 |      | 82  | 6 | 0.00 | 0.00 | 0.00 |
| 5              | 6         | 0.00 | 0.00 | 0.00 |      | 83  | 6 | 0.00 | 0.00 | 0.00 |
| 6              | 6         | 0.00 | 0.00 | 0.00 |      | 84  | 6 | 0.00 | 0.00 | 0.00 |
| 7              | 6         | 0.00 | 0.00 | 0.00 |      | 85  | 6 | 0.00 | 0.00 | 0.00 |
| 8              | 6         | 0.00 | 0.00 | 0.00 |      | 86  | 6 | 0.00 | 0.00 | 0.00 |
| 9              | 6         | 0.00 | 0.00 | 0.00 |      | 87  | 6 | 0.00 | 0.00 | 0.00 |
| 10             | 6         | 0.00 | 0.00 | 0.00 |      | 88  | 6 | 0.00 | 0.00 | 0.00 |
| 11             | 6         | 0.00 | 0.00 | 0.00 |      | 89  | 6 | 0.00 | 0.00 | 0.00 |
| 12             | 6         | 0.00 | 0.00 | 0.00 |      | 90  | 6 | 0.00 | 0.00 | 0.00 |
| 13             | 6         | 0.00 | 0.00 | 0.00 |      | 91  | 6 | 0.00 | 0.00 | 0.00 |
| 14             | 6         | 0.00 | 0.00 | 0.00 |      | 92  | 6 | 0.00 | 0.00 | 0.00 |
| 15             | 6         | 0.00 | 0.00 | 0.00 |      | 93  | 6 | 0.00 | 0.00 | 0.00 |
| 16             | 6         | 0.00 | 0.00 | 0.00 |      | 94  | 6 | 0.00 | 0.00 | 0.00 |
| 17             | 6         | 0.00 | 0.00 | 0.00 |      | 95  | 6 | 0.00 | 0.00 | 0.00 |
| 18             | 6         | 0.00 | 0.00 | 0.00 |      | 96  | 6 | 0.00 | 0.00 | 0.00 |
| 19             | 6         | 0.00 | 0.00 | 0.00 |      | 97  | 6 | 0.00 | 0.00 | 0.00 |
| 20             | 6         | 0.00 | 0.00 | 0.00 |      | 98  | 6 | 0.00 | 0.00 | 0.00 |
| 21             | 6         | 0.00 | 0.00 | 0.00 |      | 99  | 6 | 0.00 | 0.00 | 0.00 |
| 22             | 6         | 0.00 | 0.00 | 0.00 |      | 100 | 6 | 0.00 | 0.00 | 0.00 |
| 23             | 6         | 0.00 | 0.00 | 0.00 |      | 101 | 6 | 0.00 | 0.00 | 0.00 |
| 24             | 6         | 0.00 | 0.00 | 0.00 |      | 102 | 6 | 0.00 | 0.00 | 0.00 |
| 25             | 6         | 0.00 | 0.00 | 0.00 |      | 103 | 6 | 0.00 | 0.00 | 0.00 |
| 26             | 6         | 0.00 | 0.00 | 0.00 |      | 104 | 6 | 0.00 | 0.00 | 0.00 |
| 27             | 6         | 0.00 | 0.00 | 0.00 |      | 105 | 6 | 0.00 | 0.00 | 0.00 |
| 28             | 6         | 0.00 | 0.00 | 0.00 |      | 106 | 6 | 0.00 | 0.00 | 0.00 |
| 29             | 6         | 0.00 | 0.00 | 0.00 |      | 107 | 6 | 0.00 | 0.00 | 0.00 |
| 30             | 6         | 0.00 | 0.00 | 0.00 |      | 108 | 6 | 0.00 | 0.00 | 0.00 |
| 31             | 6         | 0.00 | 0.00 | 0.00 |      | 109 | 6 | 0.00 | 0.00 | 0.00 |
| 32             | 6         | 0.00 | 0.00 | 0.00 |      | 110 | 6 | 0.00 | 0.00 | 0.00 |

|     |   |      |      |      |     |   |      |      |      |     |    |       |       |       |
|-----|---|------|------|------|-----|---|------|------|------|-----|----|-------|-------|-------|
| 111 | 6 | 0.00 | 0.00 | 0.00 | 134 | 1 | 0.00 | 0.00 | 0.00 | 157 | 46 | 0.00  | 0.00  | 0.00  |
| 112 | 6 | 0.00 | 0.00 | 0.00 | 135 | 1 | 0.00 | 0.00 | 0.00 | 158 | 46 | 0.00  | 0.00  | 0.00  |
| 113 | 6 | 0.00 | 0.00 | 0.00 | 136 | 1 | 0.00 | 0.00 | 0.00 | 159 | 46 | 0.00  | 0.00  | 0.00  |
| 114 | 6 | 0.00 | 0.00 | 0.00 | 137 | 1 | 0.00 | 0.00 | 0.00 | 160 | 46 | 0.00  | 0.00  | 0.00  |
| 115 | 6 | 0.00 | 0.00 | 0.00 | 138 | 1 | 0.00 | 0.00 | 0.00 | 161 | 46 | 0.00  | 0.00  | 0.00  |
| 116 | 6 | 0.00 | 0.00 | 0.00 | 139 | 1 | 0.00 | 0.00 | 0.00 | 162 | 46 | 0.00  | 0.00  | 0.00  |
| 117 | 6 | 0.00 | 0.00 | 0.00 | 140 | 1 | 0.00 | 0.00 | 0.00 | 163 | 46 | 0.00  | 0.00  | 0.00  |
| 118 | 6 | 0.00 | 0.00 | 0.00 | 141 | 1 | 0.00 | 0.00 | 0.00 | 164 | 46 | 0.00  | 0.00  | 0.01  |
| 119 | 6 | 0.00 | 0.00 | 0.00 | 142 | 1 | 0.00 | 0.00 | 0.00 | 165 | 46 | 0.00  | 0.00  | 0.00  |
| 120 | 6 | 0.00 | 0.00 | 0.00 | 143 | 1 | 0.00 | 0.00 | 0.00 | 166 | 6  | 0.03  | 0.05  | 0.00  |
| 121 | 6 | 0.00 | 0.00 | 0.00 | 144 | 1 | 0.00 | 0.00 | 0.00 | 167 | 6  | 0.01  | 0.08  | -0.07 |
| 122 | 6 | 0.00 | 0.00 | 0.00 | 145 | 1 | 0.00 | 0.00 | 0.00 | 168 | 6  | 0.00  | 0.00  | -0.01 |
| 123 | 6 | 0.00 | 0.00 | 0.00 | 146 | 1 | 0.00 | 0.00 | 0.00 | 169 | 6  | -0.01 | -0.02 | -0.01 |
| 124 | 6 | 0.00 | 0.00 | 0.00 | 147 | 1 | 0.00 | 0.00 | 0.00 | 170 | 1  | -0.12 | -0.18 | 0.03  |
| 125 | 6 | 0.00 | 0.00 | 0.00 | 148 | 1 | 0.00 | 0.00 | 0.00 | 171 | 1  | -0.04 | -0.04 | -0.01 |
| 126 | 6 | 0.00 | 0.00 | 0.00 | 149 | 1 | 0.00 | 0.00 | 0.00 | 172 | 1  | 0.00  | 0.00  | 0.00  |
| 127 | 6 | 0.00 | 0.00 | 0.00 | 150 | 1 | 0.00 | 0.00 | 0.00 | 173 | 1  | -0.01 | -0.01 | 0.00  |
| 128 | 6 | 0.00 | 0.00 | 0.00 | 151 | 1 | 0.00 | 0.00 | 0.00 | 174 | 1  | -0.02 | 0.01  | -0.02 |
| 129 | 6 | 0.00 | 0.00 | 0.00 | 152 | 1 | 0.00 | 0.00 | 0.00 | 175 | 1  | -0.01 | -0.06 | -0.03 |
| 130 | 6 | 0.00 | 0.00 | 0.00 | 153 | 1 | 0.00 | 0.00 | 0.00 | 176 | 1  | 0.00  | 0.00  | 0.00  |
| 131 | 6 | 0.00 | 0.00 | 0.00 | 154 | 1 | 0.00 | 0.00 | 0.00 | 177 | 1  | 0.00  | -0.02 | 0.03  |
| 132 | 6 | 0.00 | 0.00 | 0.00 | 155 | 1 | 0.00 | 0.00 | 0.00 | 178 | 1  | -0.03 | 0.03  | -0.07 |
| 133 | 1 | 0.00 | 0.00 | 0.00 | 156 | 1 | 0.00 | 0.00 | 0.00 | 179 | 1  | -0.44 | -0.82 | 0.25  |

**TS pre-trans/Pd<sub>9</sub>(H)/nanotube → trans-but-2-ene/Pd<sub>9</sub>(H<sub>2</sub>)/nanotube**

|     |  |  |  |  |   |           |           |           |  |  |  |  |  |  |
|-----|--|--|--|--|---|-----------|-----------|-----------|--|--|--|--|--|--|
| 179 |  |  |  |  | C | -7.036714 | -3.421925 | 0.206568  |  |  |  |  |  |  |
|     |  |  |  |  | C | -6.165319 | -2.404219 | 2.242110  |  |  |  |  |  |  |
|     |  |  |  |  | C | -5.765166 | -3.697985 | 2.664393  |  |  |  |  |  |  |
|     |  |  |  |  | C | -6.335127 | -4.848037 | 2.057543  |  |  |  |  |  |  |
|     |  |  |  |  | C | -6.994295 | -4.704847 | 0.803234  |  |  |  |  |  |  |
|     |  |  |  |  | C | -5.678836 | -1.244775 | 2.897278  |  |  |  |  |  |  |
|     |  |  |  |  | C | -4.518624 | -1.384117 | 3.813468  |  |  |  |  |  |  |
|     |  |  |  |  | C | -3.896229 | -2.633177 | 3.926751  |  |  |  |  |  |  |
|     |  |  |  |  | C | -4.619874 | -3.847607 | 3.486669  |  |  |  |  |  |  |
|     |  |  |  |  | C | -2.592865 | -5.224484 | 3.740983  |  |  |  |  |  |  |
|     |  |  |  |  | C | -4.013151 | -5.125881 | 3.621102  |  |  |  |  |  |  |
|     |  |  |  |  | C | 0.995321  | -0.169667 | 1.633066  |  |  |  |  |  |  |
|     |  |  |  |  | C | 0.487415  | 0.120311  | -2.425944 |  |  |  |  |  |  |
|     |  |  |  |  | C | 1.207930  | 0.000719  | -1.199864 |  |  |  |  |  |  |
|     |  |  |  |  | C | -3.343620 | 0.404012  | -4.010727 |  |  |  |  |  |  |
|     |  |  |  |  | C | -1.934104 | 0.336599  | -3.932345 |  |  |  |  |  |  |
|     |  |  |  |  | C | -6.603921 | 0.368040  | -1.597462 |  |  |  |  |  |  |
|     |  |  |  |  | C | -5.843341 | 0.423091  | -2.787166 |  |  |  |  |  |  |
|     |  |  |  |  | C | -6.060122 | 0.047616  | 2.442612  |  |  |  |  |  |  |
|     |  |  |  |  | C | -6.686677 | 0.166650  | 1.180194  |  |  |  |  |  |  |
|     |  |  |  |  | C | -3.754030 | -0.171126 | 4.147669  |  |  |  |  |  |  |
|     |  |  |  |  | C | 1.462821  | 1.192478  | -0.408495 |  |  |  |  |  |  |
|     |  |  |  |  | C | 1.283675  | 1.106346  | 1.037733  |  |  |  |  |  |  |
|     |  |  |  |  | C | -1.206626 | 1.519439  | -3.649530 |  |  |  |  |  |  |
|     |  |  |  |  | C | 0.066001  | 1.422994  | -2.882396 |  |  |  |  |  |  |
|     |  |  |  |  | C | -5.259471 | 1.649030  | -3.167880 |  |  |  |  |  |  |
|     |  |  |  |  | C | -3.988501 | 1.641262  | -3.784997 |  |  |  |  |  |  |
|     |  |  |  |  | C | -6.798558 | 1.440782  | 0.578010  |  |  |  |  |  |  |
|     |  |  |  |  | C | -6.759568 | 1.540732  | -0.831046 |  |  |  |  |  |  |
|     |  |  |  |  | C | -4.419595 | 1.134409  | 4.002475  |  |  |  |  |  |  |
|     |  |  |  |  | C | -5.581175 | 1.224253  | 3.081562  |  |  |  |  |  |  |
|     |  |  |  |  | C | 1.036316  | 2.302595  | 1.771433  |  |  |  |  |  |  |
|     |  |  |  |  | C | 0.588815  | 2.569160  | -2.295320 |  |  |  |  |  |  |
|     |  |  |  |  | C | 1.320989  | 2.477304  | -1.048834 |  |  |  |  |  |  |
|     |  |  |  |  | C | -3.245291 | 2.841265  | -3.831946 |  |  |  |  |  |  |
|     |  |  |  |  | C | -1.838205 | 2.783818  | -3.745425 |  |  |  |  |  |  |
|     |  |  |  |  | C | -6.506148 | 2.795399  | -1.424278 |  |  |  |  |  |  |
|     |  |  |  |  | C | -5.743190 | 2.850735  | -2.608972 |  |  |  |  |  |  |
|     |  |  |  |  | C | -5.970004 | 2.502605  | 2.607061  |  |  |  |  |  |  |
|     |  |  |  |  | C | -6.603739 | 2.605774  | 1.350904  |  |  |  |  |  |  |
|     |  |  |  |  | C | -3.702210 | 2.300309  | 4.296661  |  |  |  |  |  |  |
|     |  |  |  |  | C | 1.402859  | 3.669875  | -0.235651 |  |  |  |  |  |  |
|     |  |  |  |  | C | 1.262296  | 3.588681  | 1.145640  |  |  |  |  |  |  |
|     |  |  |  |  | C | -1.125800 | 3.973141  | -3.447726 |  |  |  |  |  |  |
|     |  |  |  |  | C | 0.091376  | 3.904157  | -2.722771 |  |  |  |  |  |  |
|     |  |  |  |  | C | -5.172091 | 4.079603  | -2.995094 |  |  |  |  |  |  |
|     |  |  |  |  | C | -3.898508 | 4.075586  | -3.618543 |  |  |  |  |  |  |
|     |  |  |  |  | C | -6.733599 | 3.875758  | 0.744217  |  |  |  |  |  |  |
|     |  |  |  |  | C | -6.680332 | 3.971541  | -0.669447 |  |  |  |  |  |  |
|     |  |  |  |  | C | -4.326975 | 3.619617  | 4.046107  |  |  |  |  |  |  |
|     |  |  |  |  | C | -5.474066 | 3.683795  | 3.215521  |  |  |  |  |  |  |

Supplementary Material (ESI) for PCCP  
 This journal is © the Owner Societies 2009

|   |           |           |           |    |           |           |           |
|---|-----------|-----------|-----------|----|-----------|-----------|-----------|
| C | 1.088847  | 4.847616  | 1.928823  | H  | -6.886250 | 7.214026  | 1.433265  |
| C | 0.634991  | 5.083432  | -2.150711 | H  | -6.761577 | 7.369841  | -0.938697 |
| C | 1.321257  | 4.997220  | -0.904301 | H  | -3.931079 | 6.955843  | 4.626169  |
| C | -3.171708 | 5.286640  | -3.717842 | H  | -5.912899 | 7.071393  | 3.319398  |
| C | -1.750462 | 5.234451  | -3.631883 | H  | 0.949498  | -7.330213 | 0.853421  |
| C | -6.466775 | 5.234286  | -1.276193 | H  | 1.082029  | -7.133491 | -1.515120 |
| C | -5.687854 | 5.290295  | -2.469617 | H  | -0.243412 | -7.419815 | 2.649284  |
| C | -5.945992 | 4.952405  | 2.786609  | H  | -2.356220 | -7.390609 | 3.744466  |
| C | -6.595497 | 5.049567  | 1.523067  | H  | -4.487545 | -7.254110 | 3.560036  |
| C | -3.622192 | 4.812973  | 4.360954  | H  | -6.464846 | -7.019521 | 2.265234  |
| C | 1.584773  | 6.124766  | -0.098766 | H  | -7.468161 | -6.800632 | 0.402878  |
| C | 1.464282  | 6.051809  | 1.297293  | H  | -7.364080 | -6.615967 | -1.968368 |
| C | -0.969368 | 6.390365  | -3.423417 | H  | -6.192719 | -6.537320 | -3.763493 |
| C | 0.210683  | 6.316056  | -2.682311 | H  | -4.061601 | -6.564656 | -4.825287 |
| C | -5.140559 | 6.494599  | -2.954613 | H  | -1.941049 | -6.696308 | -4.670670 |
| C | -3.890943 | 6.492558  | -3.578375 | H  | 0.041959  | -6.924282 | -3.379305 |
| C | -6.818799 | 6.287812  | 0.883957  | Pd | 3.558793  | 1.681619  | -1.191581 |
| C | -6.749442 | 6.380288  | -0.507604 | Pd | 4.542011  | 0.494491  | 1.213898  |
| C | -4.330590 | 6.024736  | 4.253785  | Pd | 3.320164  | -1.965356 | 1.641064  |
| C | -5.490861 | 6.091906  | 3.482318  | Pd | 3.767385  | -1.184162 | -0.911401 |
| C | 0.976646  | -6.330745 | 0.445880  | Pd | 5.576274  | 0.151401  | -2.504791 |
| C | 1.052745  | -6.214383 | -0.949819 | Pd | 6.530077  | -0.796251 | -0.199721 |
| C | -0.645492 | -6.452433 | 2.910367  | Pd | 5.341725  | -3.154838 | 0.155801  |
| C | -1.891077 | -6.434809 | 3.556762  | Pd | 6.254449  | 1.948346  | -0.274890 |
| C | -4.811699 | -6.249431 | 3.335104  | Pd | 5.990852  | -1.538559 | 2.257074  |
| C | -5.970137 | -6.110564 | 2.570192  | C  | 7.227971  | 3.821844  | -0.907270 |
| C | -7.323404 | -5.812830 | -0.006351 | C  | 8.035009  | 3.414189  | 0.198472  |
| C | -7.267037 | -5.705033 | -1.397376 | C  | 6.236770  | 4.969543  | -0.815626 |
| C | -5.673693 | -5.595072 | -3.852865 | H  | 7.899383  | 3.970967  | 1.128256  |
| C | -4.422188 | -5.610807 | -4.472415 | C  | 9.409033  | 2.783475  | 0.004814  |
| C | -1.508536 | -5.791033 | -4.273653 | H  | 7.597161  | 3.585205  | -1.906723 |
| C | -0.342435 | -5.925395 | -3.519109 | H  | 5.828371  | 5.072157  | 0.197363  |
| H | -1.791426 | 6.904222  | 4.760128  | H  | 5.399684  | 4.826001  | -1.507158 |
| H | 0.299308  | 6.923829  | 3.625044  | H  | 6.731612  | 5.918439  | -1.080599 |
| H | 1.707117  | 7.107785  | -0.527930 | H  | 5.233205  | 1.803142  | -1.879170 |
| H | 1.509529  | 6.982828  | 1.841961  | H  | 7.216323  | 2.117358  | 0.996475  |
| H | -1.322296 | 7.376188  | -3.683784 | H  | 10.164717 | 3.579064  | -0.075670 |
| H | 0.684071  | 7.248028  | -2.412591 | H  | 9.685343  | 2.139271  | 0.845991  |
| H | -5.574552 | 7.455143  | -2.722005 | H  | 9.444950  | 2.183900  | -0.911165 |
| H | -3.447705 | 7.453330  | -3.789732 |    |           |           |           |

|                |           |      |      |      |    |      |      |      |      |     |      |      |      |      |
|----------------|-----------|------|------|------|----|------|------|------|------|-----|------|------|------|------|
| 1              |           |      |      | 30   | 6  | 0.00 | 0.00 | 0.00 | 66   | 6   | 0.00 | 0.00 | 0.00 |      |
| A              |           |      |      | 31   | 6  | 0.00 | 0.00 | 0.00 | 67   | 6   | 0.00 | 0.00 | 0.00 |      |
| Frequencies -- | -679.4889 |      |      | 32   | 6  | 0.00 | 0.00 | 0.00 | 68   | 6   | 0.00 | 0.00 | 0.00 |      |
| Red. masses -- | 1.1943    |      |      | 33   | 6  | 0.00 | 0.00 | 0.00 | 69   | 6   | 0.00 | 0.00 | 0.00 |      |
| Frc consts --  | 0.3249    |      |      | 34   | 6  | 0.00 | 0.00 | 0.00 | 70   | 6   | 0.00 | 0.00 | 0.00 |      |
| IR Inten --    | 0.0000    |      |      | 35   | 6  | 0.00 | 0.00 | 0.00 | 71   | 6   | 0.00 | 0.00 | 0.00 |      |
| Atom AN        | X         | Y    | Z    | 36   | 6  | 0.00 | 0.00 | 0.00 | 72   | 6   | 0.00 | 0.00 | 0.00 |      |
| 1              | 6         | 0.00 | 0.00 | 0.00 | 37 | 6    | 0.00 | 0.00 | 0.00 | 73  | 6    | 0.00 | 0.00 | 0.00 |
| 2              | 6         | 0.00 | 0.00 | 0.00 | 38 | 6    | 0.00 | 0.00 | 0.00 | 74  | 6    | 0.00 | 0.00 | 0.00 |
| 3              | 6         | 0.00 | 0.00 | 0.00 | 39 | 6    | 0.00 | 0.00 | 0.00 | 75  | 6    | 0.00 | 0.00 | 0.00 |
| 4              | 6         | 0.00 | 0.00 | 0.00 | 40 | 6    | 0.00 | 0.00 | 0.00 | 76  | 6    | 0.00 | 0.00 | 0.00 |
| 5              | 6         | 0.00 | 0.00 | 0.00 | 41 | 6    | 0.00 | 0.00 | 0.00 | 77  | 6    | 0.00 | 0.00 | 0.00 |
| 6              | 6         | 0.00 | 0.00 | 0.00 | 42 | 6    | 0.00 | 0.00 | 0.00 | 78  | 6    | 0.00 | 0.00 | 0.00 |
| 7              | 6         | 0.00 | 0.00 | 0.00 | 43 | 6    | 0.00 | 0.00 | 0.00 | 79  | 6    | 0.00 | 0.00 | 0.00 |
| 8              | 6         | 0.00 | 0.00 | 0.00 | 44 | 6    | 0.00 | 0.00 | 0.00 | 80  | 6    | 0.00 | 0.00 | 0.00 |
| 9              | 6         | 0.00 | 0.00 | 0.00 | 45 | 6    | 0.00 | 0.00 | 0.00 | 81  | 6    | 0.00 | 0.00 | 0.00 |
| 10             | 6         | 0.00 | 0.00 | 0.00 | 46 | 6    | 0.00 | 0.00 | 0.00 | 82  | 6    | 0.00 | 0.00 | 0.00 |
| 11             | 6         | 0.00 | 0.00 | 0.00 | 47 | 6    | 0.00 | 0.00 | 0.00 | 83  | 6    | 0.00 | 0.00 | 0.00 |
| 12             | 6         | 0.00 | 0.00 | 0.00 | 48 | 6    | 0.00 | 0.00 | 0.00 | 84  | 6    | 0.00 | 0.00 | 0.00 |
| 13             | 6         | 0.00 | 0.00 | 0.00 | 49 | 6    | 0.00 | 0.00 | 0.00 | 85  | 6    | 0.00 | 0.00 | 0.00 |
| 14             | 6         | 0.00 | 0.00 | 0.00 | 50 | 6    | 0.00 | 0.00 | 0.00 | 86  | 6    | 0.00 | 0.00 | 0.00 |
| 15             | 6         | 0.00 | 0.00 | 0.00 | 51 | 6    | 0.00 | 0.00 | 0.00 | 87  | 6    | 0.00 | 0.00 | 0.00 |
| 16             | 6         | 0.00 | 0.00 | 0.00 | 52 | 6    | 0.00 | 0.00 | 0.00 | 88  | 6    | 0.00 | 0.00 | 0.00 |
| 17             | 6         | 0.00 | 0.00 | 0.00 | 53 | 6    | 0.00 | 0.00 | 0.00 | 89  | 6    | 0.00 | 0.00 | 0.00 |
| 18             | 6         | 0.00 | 0.00 | 0.00 | 54 | 6    | 0.00 | 0.00 | 0.00 | 90  | 6    | 0.00 | 0.00 | 0.00 |
| 19             | 6         | 0.00 | 0.00 | 0.00 | 55 | 6    | 0.00 | 0.00 | 0.00 | 91  | 6    | 0.00 | 0.00 | 0.00 |
| 20             | 6         | 0.00 | 0.00 | 0.00 | 56 | 6    | 0.00 | 0.00 | 0.00 | 92  | 6    | 0.00 | 0.00 | 0.00 |
| 21             | 6         | 0.00 | 0.00 | 0.00 | 57 | 6    | 0.00 | 0.00 | 0.00 | 93  | 6    | 0.00 | 0.00 | 0.00 |
| 22             | 6         | 0.00 | 0.00 | 0.00 | 58 | 6    | 0.00 | 0.00 | 0.00 | 94  | 6    | 0.00 | 0.00 | 0.00 |
| 23             | 6         | 0.00 | 0.00 | 0.00 | 59 | 6    | 0.00 | 0.00 | 0.00 | 95  | 6    | 0.00 | 0.00 | 0.00 |
| 24             | 6         | 0.00 | 0.00 | 0.00 | 60 | 6    | 0.00 | 0.00 | 0.00 | 96  | 6    | 0.00 | 0.00 | 0.00 |
| 25             | 6         | 0.00 | 0.00 | 0.00 | 61 | 6    | 0.00 | 0.00 | 0.00 | 97  | 6    | 0.00 | 0.00 | 0.00 |
| 26             | 6         | 0.00 | 0.00 | 0.00 | 62 | 6    | 0.00 | 0.00 | 0.00 | 98  | 6    | 0.00 | 0.00 | 0.00 |
| 27             | 6         | 0.00 | 0.00 | 0.00 | 63 | 6    | 0.00 | 0.00 | 0.00 | 99  | 6    | 0.00 | 0.00 | 0.00 |
| 28             | 6         | 0.00 | 0.00 | 0.00 | 64 | 6    | 0.00 | 0.00 | 0.00 | 100 | 6    | 0.00 | 0.00 | 0.00 |
| 29             | 6         | 0.00 | 0.00 | 0.00 | 65 | 6    | 0.00 | 0.00 | 0.00 | 101 | 6    | 0.00 | 0.00 | 0.00 |

|     |   |      |      |      |     |   |      |      |      |     |    |       |       |       |
|-----|---|------|------|------|-----|---|------|------|------|-----|----|-------|-------|-------|
| 102 | 6 | 0.00 | 0.00 | 0.00 | 128 | 6 | 0.00 | 0.00 | 0.00 | 154 | 1  | 0.00  | 0.00  | 0.00  |
| 103 | 6 | 0.00 | 0.00 | 0.00 | 129 | 6 | 0.00 | 0.00 | 0.00 | 155 | 1  | 0.00  | 0.00  | 0.00  |
| 104 | 6 | 0.00 | 0.00 | 0.00 | 130 | 6 | 0.00 | 0.00 | 0.00 | 156 | 1  | 0.00  | 0.00  | 0.00  |
| 105 | 6 | 0.00 | 0.00 | 0.00 | 131 | 6 | 0.00 | 0.00 | 0.00 | 157 | 46 | 0.00  | 0.00  | 0.00  |
| 106 | 6 | 0.00 | 0.00 | 0.00 | 132 | 6 | 0.00 | 0.00 | 0.00 | 158 | 46 | 0.00  | 0.00  | 0.00  |
| 107 | 6 | 0.00 | 0.00 | 0.00 | 133 | 1 | 0.00 | 0.00 | 0.00 | 159 | 46 | 0.00  | 0.00  | 0.00  |
| 108 | 6 | 0.00 | 0.00 | 0.00 | 134 | 1 | 0.00 | 0.00 | 0.00 | 160 | 46 | 0.00  | 0.00  | 0.00  |
| 109 | 6 | 0.00 | 0.00 | 0.00 | 135 | 1 | 0.00 | 0.00 | 0.00 | 161 | 46 | 0.00  | 0.00  | 0.00  |
| 110 | 6 | 0.00 | 0.00 | 0.00 | 136 | 1 | 0.00 | 0.00 | 0.00 | 162 | 46 | 0.00  | 0.00  | 0.00  |
| 111 | 6 | 0.00 | 0.00 | 0.00 | 137 | 1 | 0.00 | 0.00 | 0.00 | 163 | 46 | 0.00  | 0.00  | 0.00  |
| 112 | 6 | 0.00 | 0.00 | 0.00 | 138 | 1 | 0.00 | 0.00 | 0.00 | 164 | 46 | 0.00  | 0.00  | -0.01 |
| 113 | 6 | 0.00 | 0.00 | 0.00 | 139 | 1 | 0.00 | 0.00 | 0.00 | 165 | 46 | 0.00  | 0.00  | 0.00  |
| 114 | 6 | 0.00 | 0.00 | 0.00 | 140 | 1 | 0.00 | 0.00 | 0.00 | 166 | 6  | -0.04 | -0.04 | 0.01  |
| 115 | 6 | 0.00 | 0.00 | 0.00 | 141 | 1 | 0.00 | 0.00 | 0.00 | 167 | 6  | -0.02 | -0.07 | 0.08  |
| 116 | 6 | 0.00 | 0.00 | 0.00 | 142 | 1 | 0.00 | 0.00 | 0.00 | 168 | 6  | 0.01  | 0.00  | 0.00  |
| 117 | 6 | 0.00 | 0.00 | 0.00 | 143 | 1 | 0.00 | 0.00 | 0.00 | 169 | 1  | 0.14  | 0.19  | -0.04 |
| 118 | 6 | 0.00 | 0.00 | 0.00 | 144 | 1 | 0.00 | 0.00 | 0.00 | 170 | 6  | 0.02  | 0.01  | 0.00  |
| 119 | 6 | 0.00 | 0.00 | 0.00 | 145 | 1 | 0.00 | 0.00 | 0.00 | 171 | 1  | 0.03  | 0.00  | 0.02  |
| 120 | 6 | 0.00 | 0.00 | 0.00 | 146 | 1 | 0.00 | 0.00 | 0.00 | 172 | 1  | -0.01 | 0.00  | 0.00  |
| 121 | 6 | 0.00 | 0.00 | 0.00 | 147 | 1 | 0.00 | 0.00 | 0.00 | 173 | 1  | 0.01  | 0.02  | -0.01 |
| 122 | 6 | 0.00 | 0.00 | 0.00 | 148 | 1 | 0.00 | 0.00 | 0.00 | 174 | 1  | 0.03  | -0.01 | 0.01  |
| 123 | 6 | 0.00 | 0.00 | 0.00 | 149 | 1 | 0.00 | 0.00 | 0.00 | 175 | 1  | 0.02  | -0.03 | 0.07  |
| 124 | 6 | 0.00 | 0.00 | 0.00 | 150 | 1 | 0.00 | 0.00 | 0.00 | 176 | 1  | 0.55  | 0.71  | -0.33 |
| 125 | 6 | 0.00 | 0.00 | 0.00 | 151 | 1 | 0.00 | 0.00 | 0.00 | 177 | 1  | -0.01 | 0.02  | -0.04 |
| 126 | 6 | 0.00 | 0.00 | 0.00 | 152 | 1 | 0.00 | 0.00 | 0.00 | 178 | 1  | 0.07  | 0.02  | -0.01 |
| 127 | 6 | 0.00 | 0.00 | 0.00 | 153 | 1 | 0.00 | 0.00 | 0.00 | 179 | 1  | -0.02 | 0.00  | 0.01  |

**TS pre-cis/Pd<sub>9</sub>(H)/nanotube → but-1-ene/Pd<sub>9</sub>(H<sub>2</sub>)/nanotube**

|     |  |  |  |  |   |           |           |           |
|-----|--|--|--|--|---|-----------|-----------|-----------|
| 179 |  |  |  |  | C | -4.491737 | -3.620979 | 3.643664  |
|     |  |  |  |  | C | -4.029375 | -4.964911 | 3.666582  |
|     |  |  |  |  | C | -2.628591 | -5.232229 | 3.577298  |
|     |  |  |  |  | C | -2.110812 | -6.509202 | 3.271926  |
|     |  |  |  |  | C | -0.981270 | -6.649692 | 2.450817  |
|     |  |  |  |  | C | -0.331293 | -5.518156 | 1.915624  |
|     |  |  |  |  | C | 0.268726  | -5.507453 | 0.628746  |
|     |  |  |  |  | C | 0.133431  | -6.464516 | -1.617243 |
|     |  |  |  |  | C | 0.258010  | -6.626085 | -0.229178 |
|     |  |  |  |  | C | 1.527541  | 0.811423  | -1.015081 |
|     |  |  |  |  | C | 0.975913  | -0.307743 | -1.756509 |
|     |  |  |  |  | C | 0.112501  | -0.059272 | -2.869663 |
|     |  |  |  |  | C | -0.642987 | -1.141647 | -3.436370 |
|     |  |  |  |  | C | -1.980793 | -0.845711 | -4.018972 |
|     |  |  |  |  | C | -2.885972 | -1.921056 | -4.201923 |
|     |  |  |  |  | C | -0.210645 | 1.297628  | -3.235117 |
|     |  |  |  |  | C | -1.557411 | 1.568598  | -3.811692 |
|     |  |  |  |  | C | -2.453548 | 0.489358  | -4.011692 |
|     |  |  |  |  | C | -3.841897 | 0.721059  | -3.882243 |
|     |  |  |  |  | C | -4.716342 | -0.381527 | -3.748435 |
|     |  |  |  |  | C | -4.270948 | -1.677939 | -4.087443 |
|     |  |  |  |  | C | -5.154343 | -2.773835 | -3.964536 |
|     |  |  |  |  | C | -4.731748 | -4.069161 | -4.349427 |
|     |  |  |  |  | C | -5.873490 | -0.245528 | -2.948923 |
|     |  |  |  |  | C | -6.542512 | -1.406842 | -2.507528 |
|     |  |  |  |  | C | -6.313188 | -2.634458 | -3.159665 |
|     |  |  |  |  | C | -7.017857 | -3.792394 | -2.746378 |
|     |  |  |  |  | C | -6.818186 | -4.973568 | -3.487979 |
|     |  |  |  |  | C | -5.682019 | -5.110276 | -4.288499 |
|     |  |  |  |  | C | -4.296061 | 2.015152  | -3.540883 |
|     |  |  |  |  | C | -5.454239 | 2.146719  | -2.742356 |
|     |  |  |  |  | C | -6.116599 | 0.982835  | -2.300526 |
|     |  |  |  |  | C | -6.693591 | 0.972603  | -1.010560 |
|     |  |  |  |  | C | -7.009340 | -0.264578 | -0.413125 |
|     |  |  |  |  | C | -7.118674 | -1.416281 | -1.220377 |
|     |  |  |  |  | C | -7.451593 | -2.651667 | -0.631351 |
|     |  |  |  |  | C | -7.604772 | -3.800497 | -1.446754 |
|     |  |  |  |  | C | -6.846724 | -0.415055 | 0.982574  |
|     |  |  |  |  | C | -6.814687 | -1.715946 | 1.530081  |
|     |  |  |  |  | C | -7.296808 | -2.805271 | 0.769697  |
|     |  |  |  |  | C | -7.318629 | -4.104987 | 1.330015  |
|     |  |  |  |  | C | -7.892462 | -5.138773 | 0.559637  |
|     |  |  |  |  | C | -8.030842 | -4.988667 | -0.821696 |
|     |  |  |  |  | C | -6.594166 | 2.127409  | -0.208359 |
|     |  |  |  |  | C | -6.433579 | 1.982399  | 1.188141  |
|     |  |  |  |  | C | -6.384462 | 0.683124  | 1.743258  |



Supplementary Material (ESI) for PCCP  
This journal is © the Owner Societies 2009

|    |           |           |           |    |           |           |           |
|----|-----------|-----------|-----------|----|-----------|-----------|-----------|
| C  | -5.595864 | 0.448553  | 2.893682  | Pd | 6.555468  | -0.683180 | 0.545889  |
| C  | -5.307777 | -0.894340 | 3.262879  | Pd | 5.644400  | 1.888865  | -0.062194 |
| C  | -6.019501 | -1.966634 | 2.668095  | C  | 6.778369  | 3.613291  | 0.947969  |
| C  | -5.718369 | -3.311846 | 3.003079  | H  | 7.649961  | 3.221534  | 1.467400  |
| C  | -6.503914 | -4.366761 | 2.468477  | Pd | 4.530657  | -1.645739 | -1.228788 |
| C  | -4.989501 | -5.977901 | 3.482398  | Pd | 6.408193  | 0.017235  | -2.116909 |
| C  | -6.221435 | -5.679876 | 2.899524  | Pd | 3.648397  | 0.919016  | -1.823487 |
| C  | -4.891146 | 1.539331  | 3.473214  | Pd | 3.872509  | 0.086697  | 0.870439  |
| C  | 0.517080  | 2.353296  | -2.696318 | C  | 6.790862  | 3.728852  | -0.473631 |
| C  | 1.404578  | 2.132235  | -1.580103 | C  | 5.953014  | 4.758574  | -1.213733 |
| C  | -3.429625 | 3.122265  | -3.673083 | H  | -0.243141 | 6.679589  | 4.677440  |
| C  | -2.041370 | 2.899620  | -3.790151 | H  | 1.661196  | 6.494492  | 3.262650  |
| C  | -6.285890 | 3.365394  | -0.810605 | H  | 2.423194  | 6.667161  | -1.051411 |
| C  | -5.705426 | 3.375345  | -2.095768 | H  | 2.591880  | 6.479704  | 1.315721  |
| C  | -5.191140 | 2.869853  | 3.085588  | H  | -0.976601 | 7.395228  | -3.718357 |
| C  | -5.988882 | 3.089325  | 1.942968  | H  | 1.159611  | 6.990416  | -2.754573 |
| C  | 1.762413  | 3.275632  | -0.775383 | H  | -5.009107 | 7.931130  | -2.148928 |
| C  | -1.158183 | 3.986594  | -3.572625 | H  | -3.071983 | 7.722070  | -3.516139 |
| C  | 0.129209  | 3.750995  | -3.026638 | H  | -5.709977 | 7.693809  | 2.150370  |
| C  | -5.055208 | 4.543608  | -2.540452 | H  | -5.924860 | 7.918906  | -0.209802 |
| C  | -3.894123 | 4.415221  | -3.344086 | H  | -2.357987 | 6.985395  | 4.847831  |
| C  | -6.057095 | 4.386651  | 1.386175  | H  | -4.482704 | 7.374234  | 3.857905  |
| C  | -6.205618 | 4.526121  | -0.016994 | H  | 0.172979  | -7.630697 | 0.157390  |
| C  | -4.472662 | 3.964125  | 3.631742  | H  | -0.030913 | -7.358738 | -2.198936 |
| C  | 0.887577  | 4.838366  | -2.523089 | H  | -0.741004 | -7.647299 | 2.114860  |
| C  | 1.735159  | 4.628815  | -1.397446 | H  | -2.656372 | -7.410209 | 3.507767  |
| C  | -3.049330 | 5.536901  | -3.524869 | H  | -4.759139 | -7.020433 | 3.640704  |
| C  | -1.646673 | 5.317398  | -3.643723 | H  | -6.860268 | -6.514528 | 2.656288  |
| C  | -5.937117 | 5.777072  | -0.626359 | H  | -8.090468 | -6.117627 | 0.968015  |
| C  | -5.341359 | 5.786051  | -1.922083 | H  | -8.318241 | -5.861741 | -1.387738 |
| C  | -4.848788 | 5.292892  | 3.301884  | H  | -7.426253 | -5.852867 | -3.338607 |
| C  | -5.665423 | 5.508499  | 2.155375  | H  | -5.492266 | -6.086001 | -4.708474 |
| C  | 2.253504  | 5.689846  | -0.625702 | H  | -3.401563 | -6.465771 | -4.869078 |
| C  | 2.353096  | 5.579963  | 0.768862  | H  | -1.297419 | -6.965032 | -3.882044 |
| C  | -0.711423 | 6.366685  | -3.528503 | H  | 6.150610  | 4.289235  | 1.527656  |
| C  | 0.543726  | 6.129701  | -2.966879 | H  | 7.668648  | 3.356890  | -1.004272 |
| C  | -4.730655 | 6.935925  | -2.460655 | H  | 5.400583  | 1.429701  | -1.995923 |
| C  | -3.592339 | 6.812068  | -3.260400 | H  | 5.784915  | 2.285964  | 1.473166  |
| C  | -5.835010 | 6.786150  | 1.580559  | C  | 6.733220  | 6.081450  | -1.436020 |
| C  | -5.964916 | 6.919712  | 0.196718  | H  | 5.645977  | 4.353323  | -2.185463 |
| C  | -2.916326 | 6.119934  | 4.524756  | H  | 5.036531  | 4.963889  | -0.645981 |
| C  | -4.161684 | 6.347389  | 3.938808  | H  | 6.113351  | 6.802252  | -1.984786 |
| Pd | 3.185563  | -2.687056 | 0.883968  | H  | 7.023027  | 6.536737  | -0.480039 |
| Pd | 5.151622  | -1.667281 | 2.571801  | H  | 7.646640  | 5.907935  | -2.020139 |
| Pd | 5.822409  | -3.252452 | 0.472285  |    |           |           |           |

|                |           |      |      |    |   |      |      |      |    |   |      |      |      |
|----------------|-----------|------|------|----|---|------|------|------|----|---|------|------|------|
| 1              |           |      |      |    |   |      |      |      |    |   |      |      |      |
| A              |           |      |      |    |   |      |      |      |    |   |      |      |      |
| Frequencies -- | -717.7170 |      |      | 25 | 6 | 0.00 | 0.00 | 0.00 | 55 | 6 | 0.00 | 0.00 | 0.00 |
| Red. masses -- | 1.1230    |      |      | 26 | 6 | 0.00 | 0.00 | 0.00 | 56 | 6 | 0.00 | 0.00 | 0.00 |
| Frc consts --  | 0.3408    |      |      | 27 | 6 | 0.00 | 0.00 | 0.00 | 57 | 6 | 0.00 | 0.00 | 0.00 |
| IR Inten --    | 0.0000    |      |      | 28 | 6 | 0.00 | 0.00 | 0.00 | 58 | 6 | 0.00 | 0.00 | 0.00 |
| Atom AN        | X         | Y    | Z    | 29 | 6 | 0.00 | 0.00 | 0.00 | 59 | 6 | 0.00 | 0.00 | 0.00 |
| 1              | 6         | 0.00 | 0.00 | 30 | 6 | 0.00 | 0.00 | 0.00 | 60 | 6 | 0.00 | 0.00 | 0.00 |
| 2              | 6         | 0.00 | 0.00 | 31 | 6 | 0.00 | 0.00 | 0.00 | 61 | 6 | 0.00 | 0.00 | 0.00 |
| 3              | 6         | 0.00 | 0.00 | 32 | 6 | 0.00 | 0.00 | 0.00 | 62 | 6 | 0.00 | 0.00 | 0.00 |
| 4              | 6         | 0.00 | 0.00 | 33 | 6 | 0.00 | 0.00 | 0.00 | 63 | 6 | 0.00 | 0.00 | 0.00 |
| 5              | 6         | 0.00 | 0.00 | 34 | 6 | 0.00 | 0.00 | 0.00 | 64 | 6 | 0.00 | 0.00 | 0.00 |
| 6              | 6         | 0.00 | 0.00 | 35 | 6 | 0.00 | 0.00 | 0.00 | 65 | 6 | 0.00 | 0.00 | 0.00 |
| 7              | 6         | 0.00 | 0.00 | 36 | 6 | 0.00 | 0.00 | 0.00 | 66 | 6 | 0.00 | 0.00 | 0.00 |
| 8              | 6         | 0.00 | 0.00 | 37 | 6 | 0.00 | 0.00 | 0.00 | 67 | 6 | 0.00 | 0.00 | 0.00 |
| 9              | 6         | 0.00 | 0.00 | 38 | 6 | 0.00 | 0.00 | 0.00 | 68 | 6 | 0.00 | 0.00 | 0.00 |
| 10             | 6         | 0.00 | 0.00 | 39 | 6 | 0.00 | 0.00 | 0.00 | 69 | 6 | 0.00 | 0.00 | 0.00 |
| 11             | 6         | 0.00 | 0.00 | 40 | 6 | 0.00 | 0.00 | 0.00 | 70 | 6 | 0.00 | 0.00 | 0.00 |
| 12             | 6         | 0.00 | 0.00 | 41 | 6 | 0.00 | 0.00 | 0.00 | 71 | 6 | 0.00 | 0.00 | 0.00 |
| 13             | 6         | 0.00 | 0.00 | 42 | 6 | 0.00 | 0.00 | 0.00 | 72 | 6 | 0.00 | 0.00 | 0.00 |
| 14             | 6         | 0.00 | 0.00 | 43 | 6 | 0.00 | 0.00 | 0.00 | 73 | 6 | 0.00 | 0.00 | 0.00 |
| 15             | 6         | 0.00 | 0.00 | 44 | 6 | 0.00 | 0.00 | 0.00 | 74 | 6 | 0.00 | 0.00 | 0.00 |
| 16             | 6         | 0.00 | 0.00 | 45 | 6 | 0.00 | 0.00 | 0.00 | 75 | 6 | 0.00 | 0.00 | 0.00 |
| 17             | 6         | 0.00 | 0.00 | 46 | 6 | 0.00 | 0.00 | 0.00 | 76 | 6 | 0.00 | 0.00 | 0.00 |
| 18             | 6         | 0.00 | 0.00 | 47 | 6 | 0.00 | 0.00 | 0.00 | 77 | 6 | 0.00 | 0.00 | 0.00 |
| 19             | 6         | 0.00 | 0.00 | 48 | 6 | 0.00 | 0.00 | 0.00 | 78 | 6 | 0.00 | 0.00 | 0.00 |
| 20             | 6         | 0.00 | 0.00 | 49 | 6 | 0.00 | 0.00 | 0.00 | 79 | 6 | 0.00 | 0.00 | 0.00 |
| 21             | 6         | 0.00 | 0.00 | 50 | 6 | 0.00 | 0.00 | 0.00 | 80 | 6 | 0.00 | 0.00 | 0.00 |
| 22             | 6         | 0.00 | 0.00 | 51 | 6 | 0.00 | 0.00 | 0.00 | 81 | 6 | 0.00 | 0.00 | 0.00 |
| 23             | 6         | 0.00 | 0.00 | 52 | 6 | 0.00 | 0.00 | 0.00 | 82 | 6 | 0.00 | 0.00 | 0.00 |
| 24             | 6         | 0.00 | 0.00 | 53 | 6 | 0.00 | 0.00 | 0.00 | 83 | 6 | 0.00 | 0.00 | 0.00 |
|                |           |      |      | 54 | 6 | 0.00 | 0.00 | 0.00 | 84 | 6 | 0.00 | 0.00 | 0.00 |



Supplementary Material (ESI) for PCCP  
 This journal is © the Owner Societies 2009

|   |           |           |           |    |           |           |           |
|---|-----------|-----------|-----------|----|-----------|-----------|-----------|
| C | 1.306105  | 2.609987  | -0.840717 | C  | 0.055218  | -5.790528 | -3.566056 |
| C | -3.160215 | 2.868764  | -3.791533 | H  | -2.218491 | 6.767960  | 4.941674  |
| C | -1.756362 | 2.861038  | -3.649621 | H  | -0.087125 | 6.894204  | 3.892219  |
| C | -6.514892 | 2.643843  | -1.525773 | H  | 1.482238  | 7.236441  | -0.193782 |
| C | -5.705243 | 2.756524  | -2.674858 | H  | 1.187837  | 7.044462  | 2.161304  |
| C | -6.136846 | 2.270202  | 2.516264  | H  | -1.417298 | 7.466700  | -3.468728 |
| C | -6.721763 | 2.381422  | 1.237339  | H  | 0.541328  | 7.383209  | -2.121029 |
| C | -3.932615 | 2.109730  | 4.291882  | H  | -5.705023 | 7.365296  | -2.673236 |
| C | 1.303439  | 3.783219  | 0.004494  | H  | -3.538587 | 7.467923  | -3.652364 |
| C | 1.102421  | 3.661667  | 1.375289  | H  | -7.180216 | 6.972849  | 1.415417  |
| C | -1.101518 | 4.068607  | -3.298621 | H  | -6.961338 | 7.192400  | -0.944657 |
| C | 0.088918  | 4.027963  | -2.528660 | H  | -4.351825 | 6.743719  | 4.722200  |
| C | -5.164991 | 4.014597  | -3.007569 | H  | -6.282578 | 6.818565  | 3.338028  |
| C | -3.867726 | 4.072623  | -3.577307 | H  | 1.220705  | -7.254077 | 0.822140  |
| C | -6.873865 | 3.660608  | 0.655568  | H  | 1.441880  | -6.995469 | -1.533610 |
| C | -6.764597 | 3.793619  | -0.751842 | H  | -0.039766 | -7.430822 | 2.564098  |
| C | -4.597005 | 3.410772  | 4.047784  | H  | -2.195662 | -7.506720 | 3.569396  |
| C | -5.711350 | 3.453266  | 3.172503  | H  | -4.321196 | -7.445299 | 3.297981  |
| C | 0.848014  | 4.893074  | 2.179741  | H  | -6.252852 | -7.252182 | 1.929525  |
| C | 0.563298  | 5.212883  | -1.908628 | H  | -7.189062 | -7.023872 | 0.033482  |
| C | 1.198687  | 5.122540  | -0.635975 | H  | -6.994925 | -6.776216 | -2.326403 |
| C | -3.184001 | 5.311687  | -3.619791 | H  | -5.754343 | -6.609551 | -4.068253 |
| C | -1.766123 | 5.309977  | -3.479457 | H  | -3.581679 | -6.532285 | -5.039410 |
| C | -6.572927 | 5.078077  | -1.319095 | H  | -1.465987 | -6.590195 | -4.799785 |
| C | -5.747226 | 5.192177  | -2.476432 | H  | 0.471117  | -6.777836 | -3.434302 |
| C | -6.213131 | 4.713952  | 2.754244  | Pd | 3.595795  | 1.929798  | -0.721367 |
| C | -6.812715 | 4.818845  | 1.466892  | Pd | 4.649387  | 0.478714  | 1.445923  |
| C | -3.951238 | 4.621156  | 4.419052  | Pd | 3.384981  | -1.897845 | 1.821709  |
| C | 1.381138  | 6.238919  | 0.206522  | Pd | 3.717954  | -1.086404 | -0.745689 |
| C | 1.202872  | 6.126274  | 1.593715  | Pd | 5.340500  | 0.405880  | -2.355104 |
| C | -1.037852 | 6.488854  | -3.215690 | Pd | 6.526922  | -0.786554 | -0.295764 |
| C | 0.114274  | 6.441037  | -2.429925 | Pd | 5.280279  | -3.172071 | 0.161847  |
| C | -5.226139 | 6.427345  | -2.909898 | Pd | 6.289628  | 1.908527  | -0.223841 |
| C | -3.953260 | 6.486546  | -3.481704 | Pd | 6.133616  | -1.597568 | 2.183976  |
| C | -7.055135 | 6.063727  | 0.847947  | C  | 6.403338  | 4.111335  | -0.612067 |
| C | -6.930467 | 6.193463  | -0.536776 | C  | 7.833816  | 4.151695  | -0.027026 |
| C | -4.700466 | 5.808107  | 4.311914  | C  | 6.301194  | 4.591811  | -2.074112 |
| C | -5.830440 | 5.851625  | 3.495101  | C  | 7.022904  | 3.710819  | -3.114463 |
| C | 1.227649  | -6.244649 | 0.439070  | H  | 5.171736  | 3.044619  | -0.676395 |
| C | 1.356281  | -6.091946 | -0.949211 | H  | 5.742675  | 4.706545  | 0.030556  |
| C | -0.489175 | -6.485623 | 2.829190  | H  | 8.543064  | 3.509913  | -0.565378 |
| C | -1.760139 | -6.530019 | 3.422692  | H  | 7.853905  | 3.880889  | 1.036573  |
| C | -4.674480 | -6.448078 | 3.084005  | H  | 8.215332  | 5.185902  | -0.105801 |
| C | -5.806002 | -6.333353 | 2.275968  | H  | 5.241250  | 4.674739  | -2.349728 |
| C | -7.065241 | -6.021485 | -0.346101 | H  | 6.722281  | 5.612454  | -2.117858 |
| C | -6.956023 | -5.876890 | -1.730627 | H  | 6.892913  | 4.120562  | -4.124758 |
| C | -5.267762 | -5.647040 | -4.113251 | H  | 6.607442  | 2.690382  | -3.100686 |
| C | -3.991991 | -5.601438 | -4.679521 | H  | 8.100398  | 3.640027  | -2.916616 |
| C | -1.084076 | -5.679965 | -4.364103 |    |           |           |           |

|                |           |      |      |      |      |      |      |      |      |      |      |      |      |      |
|----------------|-----------|------|------|------|------|------|------|------|------|------|------|------|------|------|
| 1              | 21        | 6    | 0.00 | 0.00 | 0.00 | 48   | 6    | 0.00 | 0.00 | 0.00 |      |      |      |      |
| A              | 22        | 6    | 0.00 | 0.00 | 0.00 | 49   | 6    | 0.00 | 0.00 | 0.00 |      |      |      |      |
| Frequencies -- | -800.3138 | 23   | 6    | 0.00 | 0.00 | 0.00 | 50   | 6    | 0.00 | 0.00 | 0.00 |      |      |      |
| Red. masses -- | 1.1284    | 24   | 6    | 0.00 | 0.00 | 0.00 | 51   | 6    | 0.00 | 0.00 | 0.00 |      |      |      |
| Frc consts --  | 0.4258    | 25   | 6    | 0.00 | 0.00 | 0.00 | 52   | 6    | 0.00 | 0.00 | 0.00 |      |      |      |
| IR Inten --    | 0.0000    | 26   | 6    | 0.00 | 0.00 | 0.00 | 53   | 6    | 0.00 | 0.00 | 0.00 |      |      |      |
| Atom AN        | X         | Y    | Z    | 27   | 6    | 0.00 | 0.00 | 0.00 | 54   | 6    | 0.00 | 0.00 | 0.00 |      |
| 1              | 6         | 0.00 | 0.00 | 0.00 | 28   | 6    | 0.00 | 0.00 | 0.00 | 55   | 6    | 0.00 | 0.00 | 0.00 |
| 2              | 6         | 0.00 | 0.00 | 0.00 | 29   | 6    | 0.00 | 0.00 | 0.00 | 56   | 6    | 0.00 | 0.00 | 0.00 |
| 3              | 6         | 0.00 | 0.00 | 0.00 | 30   | 6    | 0.00 | 0.00 | 0.00 | 57   | 6    | 0.00 | 0.00 | 0.00 |
| 4              | 6         | 0.00 | 0.00 | 0.00 | 31   | 6    | 0.00 | 0.00 | 0.00 | 58   | 6    | 0.00 | 0.00 | 0.00 |
| 5              | 6         | 0.00 | 0.00 | 0.00 | 32   | 6    | 0.00 | 0.00 | 0.00 | 59   | 6    | 0.00 | 0.00 | 0.00 |
| 6              | 6         | 0.00 | 0.00 | 0.00 | 33   | 6    | 0.00 | 0.00 | 0.00 | 60   | 6    | 0.00 | 0.00 | 0.00 |
| 7              | 6         | 0.00 | 0.00 | 0.00 | 34   | 6    | 0.00 | 0.00 | 0.00 | 61   | 6    | 0.00 | 0.00 | 0.00 |
| 8              | 6         | 0.00 | 0.00 | 0.00 | 35   | 6    | 0.00 | 0.00 | 0.00 | 62   | 6    | 0.00 | 0.00 | 0.00 |
| 9              | 6         | 0.00 | 0.00 | 0.00 | 36   | 6    | 0.00 | 0.00 | 0.00 | 63   | 6    | 0.00 | 0.00 | 0.00 |
| 10             | 6         | 0.00 | 0.00 | 0.00 | 37   | 6    | 0.00 | 0.00 | 0.00 | 64   | 6    | 0.00 | 0.00 | 0.00 |
| 11             | 6         | 0.00 | 0.00 | 0.00 | 38   | 6    | 0.00 | 0.00 | 0.00 | 65   | 6    | 0.00 | 0.00 | 0.00 |
| 12             | 6         | 0.00 | 0.00 | 0.00 | 39   | 6    | 0.00 | 0.00 | 0.00 | 66   | 6    | 0.00 | 0.00 | 0.00 |
| 13             | 6         | 0.00 | 0.00 | 0.00 | 40   | 6    | 0.00 | 0.00 | 0.00 | 67   | 6    | 0.00 | 0.00 | 0.00 |
| 14             | 6         | 0.00 | 0.00 | 0.00 | 41   | 6    | 0.00 | 0.00 | 0.00 | 68   | 6    | 0.00 | 0.00 | 0.00 |
| 15             | 6         | 0.00 | 0.00 | 0.00 | 42   | 6    | 0.00 | 0.00 | 0.00 | 69   | 6    | 0.00 | 0.00 | 0.00 |
| 16             | 6         | 0.00 | 0.00 | 0.00 | 43   | 6    | 0.00 | 0.00 | 0.00 | 70   | 6    | 0.00 | 0.00 | 0.00 |
| 17             | 6         | 0.00 | 0.00 | 0.00 | 44   | 6    | 0.00 | 0.00 | 0.00 | 71   | 6    | 0.02 | 0.00 | 0.00 |
| 18             | 6         | 0.00 | 0.00 | 0.00 | 45   | 6    | 0.00 | 0.00 | 0.00 | 72   | 6    | 0.00 | 0.00 | 0.00 |
| 19             | 6         | 0.00 | 0.00 | 0.00 | 46   | 6    | 0.00 | 0.00 | 0.00 | 73   | 6    | 0.00 | 0.00 | 0.00 |
| 20             | 6         | 0.00 | 0.00 | 0.00 | 47   | 6    | 0.00 | 0.00 | 0.00 | 74   | 6    | 0.00 | 0.00 | 0.00 |

Supplementary Material (ESI) for PCCP  
This journal is © the Owner Societies 2009

|     |   |      |      |      |     |   |      |      |      |     |    |       |       |       |
|-----|---|------|------|------|-----|---|------|------|------|-----|----|-------|-------|-------|
| 75  | 6 | 0.00 | 0.00 | 0.00 | 110 | 6 | 0.00 | 0.00 | 0.00 | 145 | 1  | 0.00  | 0.00  | 0.00  |
| 76  | 6 | 0.00 | 0.00 | 0.00 | 111 | 6 | 0.00 | 0.00 | 0.00 | 146 | 1  | 0.00  | 0.00  | 0.00  |
| 77  | 6 | 0.00 | 0.00 | 0.00 | 112 | 6 | 0.00 | 0.00 | 0.00 | 147 | 1  | 0.00  | 0.00  | 0.00  |
| 78  | 6 | 0.00 | 0.00 | 0.00 | 113 | 6 | 0.00 | 0.00 | 0.00 | 148 | 1  | 0.00  | 0.00  | 0.00  |
| 79  | 6 | 0.00 | 0.00 | 0.00 | 114 | 6 | 0.00 | 0.00 | 0.00 | 149 | 1  | 0.00  | 0.00  | 0.00  |
| 80  | 6 | 0.00 | 0.00 | 0.00 | 115 | 6 | 0.00 | 0.00 | 0.00 | 150 | 1  | 0.00  | 0.00  | 0.00  |
| 81  | 6 | 0.00 | 0.00 | 0.00 | 116 | 6 | 0.00 | 0.00 | 0.00 | 151 | 1  | 0.00  | 0.00  | 0.00  |
| 82  | 6 | 0.00 | 0.00 | 0.00 | 117 | 6 | 0.00 | 0.00 | 0.00 | 152 | 1  | 0.00  | 0.00  | 0.00  |
| 83  | 6 | 0.01 | 0.00 | 0.00 | 118 | 6 | 0.00 | 0.00 | 0.00 | 153 | 1  | 0.00  | 0.00  | 0.00  |
| 84  | 6 | 0.00 | 0.00 | 0.00 | 119 | 6 | 0.00 | 0.00 | 0.00 | 154 | 1  | 0.00  | 0.00  | 0.00  |
| 85  | 6 | 0.00 | 0.00 | 0.00 | 120 | 6 | 0.00 | 0.00 | 0.00 | 155 | 1  | 0.00  | 0.00  | 0.00  |
| 86  | 6 | 0.00 | 0.00 | 0.00 | 121 | 6 | 0.00 | 0.00 | 0.00 | 156 | 1  | 0.00  | 0.00  | 0.00  |
| 87  | 6 | 0.00 | 0.00 | 0.00 | 122 | 6 | 0.00 | 0.00 | 0.00 | 157 | 46 | 0.00  | 0.00  | 0.00  |
| 88  | 6 | 0.00 | 0.00 | 0.00 | 123 | 6 | 0.00 | 0.00 | 0.00 | 158 | 46 | 0.00  | 0.00  | 0.00  |
| 89  | 6 | 0.00 | 0.00 | 0.00 | 124 | 6 | 0.00 | 0.00 | 0.00 | 159 | 46 | 0.00  | 0.00  | 0.00  |
| 90  | 6 | 0.00 | 0.00 | 0.00 | 125 | 6 | 0.00 | 0.00 | 0.00 | 160 | 46 | 0.00  | 0.00  | 0.00  |
| 91  | 6 | 0.00 | 0.00 | 0.00 | 126 | 6 | 0.00 | 0.00 | 0.00 | 161 | 46 | 0.00  | 0.00  | 0.00  |
| 92  | 6 | 0.00 | 0.00 | 0.00 | 127 | 6 | 0.00 | 0.00 | 0.00 | 162 | 46 | 0.00  | 0.00  | 0.00  |
| 93  | 6 | 0.00 | 0.00 | 0.00 | 128 | 6 | 0.00 | 0.00 | 0.00 | 163 | 46 | 0.00  | 0.00  | 0.00  |
| 94  | 6 | 0.00 | 0.00 | 0.00 | 129 | 6 | 0.00 | 0.00 | 0.00 | 164 | 46 | 0.00  | -0.02 | 0.00  |
| 95  | 6 | 0.00 | 0.00 | 0.00 | 130 | 6 | 0.00 | 0.00 | 0.00 | 165 | 46 | 0.00  | 0.00  | 0.00  |
| 96  | 6 | 0.00 | 0.00 | 0.00 | 131 | 6 | 0.00 | 0.00 | 0.00 | 166 | 6  | -0.07 | 0.03  | -0.01 |
| 97  | 6 | 0.00 | 0.00 | 0.00 | 132 | 6 | 0.00 | 0.00 | 0.00 | 167 | 6  | -0.02 | -0.01 | 0.00  |
| 98  | 6 | 0.00 | 0.00 | 0.00 | 133 | 1 | 0.00 | 0.00 | 0.00 | 168 | 6  | 0.00  | 0.03  | -0.02 |
| 99  | 6 | 0.00 | 0.00 | 0.00 | 134 | 1 | 0.00 | 0.00 | 0.00 | 169 | 6  | 0.00  | 0.00  | 0.00  |
| 100 | 6 | 0.00 | 0.00 | 0.00 | 135 | 1 | 0.00 | 0.00 | 0.00 | 170 | 1  | 0.71  | 0.64  | 0.08  |
| 101 | 6 | 0.00 | 0.00 | 0.00 | 136 | 1 | 0.00 | 0.00 | 0.00 | 171 | 1  | 0.09  | 0.25  | -0.03 |
| 102 | 6 | 0.00 | 0.00 | 0.00 | 137 | 1 | 0.00 | 0.00 | 0.00 | 172 | 1  | -0.03 | -0.02 | 0.00  |
| 103 | 6 | 0.00 | 0.00 | 0.00 | 138 | 1 | 0.00 | 0.00 | 0.00 | 173 | 1  | -0.01 | -0.01 | 0.00  |
| 104 | 6 | 0.00 | 0.00 | 0.00 | 139 | 1 | 0.00 | 0.00 | 0.00 | 174 | 1  | -0.04 | -0.01 | -0.02 |
| 105 | 6 | 0.00 | 0.00 | 0.00 | 140 | 1 | 0.00 | 0.00 | 0.00 | 175 | 1  | 0.01  | 0.04  | -0.04 |
| 106 | 6 | 0.00 | 0.00 | 0.00 | 141 | 1 | 0.00 | 0.00 | 0.00 | 176 | 1  | 0.02  | 0.02  | -0.03 |
| 107 | 6 | 0.00 | 0.00 | 0.00 | 142 | 1 | 0.00 | 0.00 | 0.00 | 177 | 1  | 0.00  | -0.01 | 0.00  |
| 108 | 6 | 0.00 | 0.00 | 0.00 | 143 | 1 | 0.00 | 0.00 | 0.00 | 178 | 1  | 0.00  | 0.00  | 0.01  |
| 109 | 6 | 0.00 | 0.00 | 0.00 | 144 | 1 | 0.00 | 0.00 | 0.00 | 179 | 1  | 0.00  | 0.00  | 0.00  |
